# Supplementary material
Source: PubMed Central journal article supplement (PMC3221392)
Supplement: NIHMS336659-supplement-SupportingInfo.pdf [file NIHMS336659-supplement-SupportingInfo.pdf]

Table S1. Crystallographic Data and Data Collection Parameters.

| Molecule                           | [Cu(2,7-dioxoOEiBC)][SbCl <sub>6</sub> ] · 0.5 CHCl <sub>3</sub>                          | [Cu(2,7,12-trioxoOEHP)][SbCl <sub>6</sub> ] · 1.25(CH <sub>2</sub> Cl <sub>2</sub> )         |
|------------------------------------|-------------------------------------------------------------------------------------------|----------------------------------------------------------------------------------------------|
| Formula                            | Cu N <sub>4</sub> C <sub>36.5</sub> H <sub>44.5</sub> O <sub>2</sub> Sb Cl <sub>7.5</sub> | Cu N <sub>4</sub> C <sub>37.25</sub> H <sub>46.50</sub> O <sub>3</sub> Sb Cl <sub>8.50</sub> |
| FW, amu                            | 1022.43                                                                                   | 1077.34                                                                                      |
| a, Å                               | 9.655(4)                                                                                  | 31.085 (14)                                                                                  |
| b, Å                               | 20.592(8)                                                                                 | —                                                                                            |
| c, Å                               | 43.347(17)                                                                                | 9.410 (4)                                                                                    |
| β, °                               | 89.97(1)                                                                                  | —                                                                                            |
| V, Å <sup>3</sup>                  | 8618(6)                                                                                   | 9093 (7)                                                                                     |
| Space group                        | P2 <sub>1</sub> /n                                                                        | P4 <sub>2</sub> /n                                                                           |
| Z                                  | 8                                                                                         | 8                                                                                            |
| D <sub>c</sub> , g/cm <sup>3</sup> | 1.576                                                                                     | 1.574                                                                                        |
| F(000)                             | 4120                                                                                      | 4312.00                                                                                      |
| μ, mm <sup>-1</sup>                | 1.622                                                                                     | 1.601                                                                                        |
| Radiation                          | MoKα, λ = 0.71073 Å                                                                       | MoKα, λ = 0.71073 Å                                                                          |
| Temp, K                            | 100 (2)                                                                                   | 127 (1)                                                                                      |
| Diffractometer                     | Bruker Apex                                                                               | FAST                                                                                         |
| Total collected data               | 63639                                                                                     | 28222                                                                                        |
| Unique collected data              | 15176                                                                                     | 8981                                                                                         |
| Unique observed data [I>2σ(I)]     | 11785                                                                                     | 7338                                                                                         |
| Variables refined                  | 977                                                                                       | 509                                                                                          |
| max(Δρ), eÅ <sup>-3</sup>          | 0.96                                                                                      | 1.156                                                                                        |
| min(Δρ), eÅ <sup>-3</sup>          | - 1.24                                                                                    | - 1.429                                                                                      |
| Final R indices [I>2σ(I)]          | R <sub>1</sub> = 0.0525, wR <sub>2</sub> = 0.0948                                         | R <sub>1</sub> = 0.0397; wR <sub>2</sub> = 0.1000                                            |
| Final R indices (all data)         | R <sub>1</sub> = 0.0753, wR <sub>2</sub> = 0.1145                                         | R <sub>1</sub> = 0.0553; wR <sub>2</sub> = 0.1171                                            |
| Goodness-of-fit on F <sup>2</sup>  | 1.06                                                                                      | 1.089                                                                                        |

**Table S2. Atomic coordinates and equivalent isotropic displacement parameters ( $\text{\AA}^2$ ) for  $[\text{Cu}(\text{trioxoOEHP})][\text{SbCl}_6] \cdot 1.25\text{-}[\text{CH}_2\text{Cl}_2]$ .  $U(\text{eq})$  is defined as one third of the trace of the orthogonalized  $U_{ij}$  tensor.<sup>a</sup>**

|       | x           | y           | z          | $U(\text{eq})$ |
|-------|-------------|-------------|------------|----------------|
| Cu    | 0.98475(1)  | 0.20920(1)  | 0.22463(4) | 0.01264(10)    |
| N(1)  | 0.98290(9)  | 0.14380(9)  | 0.2428(3)  | 0.0151(6)      |
| N(3)  | 0.98699(9)  | 0.27416(9)  | 0.2047(3)  | 0.0151(6)      |
| N(2)  | 1.04990(9)  | 0.20743(9)  | 0.2442(3)  | 0.0165(6)      |
| N(4)  | 0.92074(9)  | 0.21125(9)  | 0.2082(3)  | 0.0145(6)      |
| C(a1) | 0.94595(11) | 0.11985(11) | 0.2285(4)  | 0.0173(7)      |
| C(a2) | 1.01607(12) | 0.11672(11) | 0.2704(4)  | 0.0188(7)      |
| C(a3) | 1.07321(11) | 0.17046(11) | 0.2660(4)  | 0.0176(7)      |
| C(a4) | 1.07770(11) | 0.24129(11) | 0.2362(4)  | 0.0182(7)      |
| C(a5) | 1.02403(11) | 0.29748(11) | 0.1984(4)  | 0.0174(7)      |
| C(a6) | 0.95264(11) | 0.30158(11) | 0.1881(4)  | 0.0171(7)      |
| C(a7) | 0.89544(10) | 0.24741(11) | 0.1975(4)  | 0.0155(7)      |
| C(a8) | 0.89277(11) | 0.17718(11) | 0.2019(4)  | 0.0156(7)      |
| C(b1) | 0.95566(12) | 0.07325(12) | 0.2432(4)  | 0.0213(8)      |
| C(b2) | 1.00169(12) | 0.07023(12) | 0.2909(5)  | 0.0272(9)      |
| C(b3) | 1.12033(12) | 0.18067(12) | 0.2736(5)  | 0.0235(8)      |
| C(b4) | 1.12468(11) | 0.22889(12) | 0.2547(5)  | 0.0240(8)      |
| C(b5) | 1.01438(11) | 0.34386(11) | 0.1721(4)  | 0.0195(7)      |
| C(b6) | 0.96610(11) | 0.34813(11) | 0.1629(4)  | 0.0201(7)      |
| C(b7) | 0.84985(11) | 0.23563(12) | 0.1876(4)  | 0.0174(7)      |
| C(b8) | 0.84830(11) | 0.19202(12) | 0.1887(4)  | 0.0178(7)      |
| C(m1) | 1.05874(11) | 0.12902(11) | 0.2793(4)  | 0.0187(7)      |
| C(m2) | 1.06578(11) | 0.28351(11) | 0.2124(4)  | 0.0201(7)      |

**Table S2. (cont.)**

|       |             |             |             |            |
|-------|-------------|-------------|-------------|------------|
| C(m3) | 0.91039(11) | 0.28930(11) | 0.1890(4)   | 0.0178(7)  |
| C(m4) | 0.90474(11) | 0.13433(11) | 0.2093(4)   | 0.0170(7)  |
| O(1)  | 0.93084(9)  | 0.04354(8)  | 0.2242(3)   | 0.0270(6)  |
| O(2)  | 1.14906(9)  | 0.15471(9)  | 0.2912(4)   | 0.0358(8)  |
| O(3)  | 1.04102(8)  | 0.37233(8)  | 0.1608(3)   | 0.0275(6)  |
| C(11) | 1.02681(14) | 0.03743(13) | 0.2069(6)   | 0.0357(11) |
| C(21) | 0.99787(13) | 0.06026(13) | 0.4594(5)   | 0.0352(10) |
| C(31) | 1.14476(13) | 0.24945(13) | 0.3881(5)   | 0.0319(10) |
| C(41) | 1.15158(12) | 0.23910(13) | 0.1206(5)   | 0.0309(10) |
| C(51) | 0.94910(13) | 0.37909(12) | 0.2771(5)   | 0.0292(9)  |
| C(61) | 0.95311(13) | 0.36423(12) | 0.0130(5)   | 0.0271(9)  |
| C(71) | 0.81341(11) | 0.26703(12) | 0.1694(4)   | 0.0208(7)  |
| C(81) | 0.81021(11) | 0.16256(12) | 0.1723(4)   | 0.0218(7)  |
| C(12) | 1.02815(15) | 0.04760(15) | 0.0483(7)   | 0.0491(15) |
| C(22) | 1.04030(15) | 0.0556(2)   | 0.5363(6)   | 0.0411(11) |
| C(32) | 1.1206(2)   | 0.2396(2)   | 0.5275(6)   | 0.0443(11) |
| C(42) | 1.1338(2)   | 0.2210(2)   | -0.0178(6)  | 0.0441(12) |
| C(52) | 0.9630(2)   | 0.36783(15) | 0.4284(5)   | 0.0382(11) |
| C(62) | 0.9663(2)   | 0.33500(14) | -0.1090(5)  | 0.0383(11) |
| C(72) | 0.80590(14) | 0.27987(15) | 0.0160(5)   | 0.0339(10) |
| C(82) | 0.80529(14) | 0.14613(14) | 0.0207(5)   | 0.0328(9)  |
| Sb    | 0.69392(1)  | 0.03816(1)  | 0.22591(3)  | 0.02179(9) |
| Cl(1) | 0.72406(3)  | -0.00808(3) | 0.40070(11) | 0.0333(2)  |
| Cl(2) | 0.63035(4)  | 0.04182(4)  | 0.36343(13) | 0.0435(3)  |
| Cl(3) | 0.72228(4)  | 0.09898(4)  | 0.34490(12) | 0.0407(3)  |
| Cl(4) | 0.66258(4)  | 0.08462(4)  | 0.05459(11) | 0.0402(3)  |
| Cl(5) | 0.75699(4)  | 0.03280(5)  | 0.08612(14) | 0.0511(3)  |
| Cl(6) | 0.66682(5)  | -0.02277(4) | 0.10523(14) | 0.0496(3)  |

**Table S2. (cont.)**

|        |            |            |            |            |
|--------|------------|------------|------------|------------|
| CS(1)  | 1.0897(6)  | 0.3843(7)  | 0.7036(21) | 0.100(5)   |
| CS(2)  | 1.0634(6)  | 0.3483(6)  | 0.6861(19) | 0.088(5)   |
| Cl(11) | 1.09096(6) | 0.35745(6) | 0.5273(2)  | 0.0733(5)  |
| Cl(12) | 1.1030(3)  | 0.3466(3)  | 0.8330(8)  | 0.077(2)   |
| Cl(13) | 1.1207(5)  | 0.3366(5)  | 0.8244(14) | 0.089(3)   |
| Cl(14) | 1.1171(8)  | 0.3577(7)  | 0.8393(23) | 0.099(6)   |
| Cl(15) | 1.0936(4)  | 0.3337(4)  | 0.8258(14) | 0.079(4)   |
| Cl(16) | 1.0614(14) | 0.4009(14) | 0.7711(46) | 0.085(11)  |
| CS(3)  | 1.2532(11) | 0.2249(8)  | 0.7620(33) | 0.069(7)   |
| Cl(17) | 1.2500     | 0.2500     | 0.5906(5)  | 0.0462(10) |
| Cl(18) | 1.2345(2)  | 0.2449(2)  | 0.6070(8)  | 0.0570(14) |

---

<sup>a</sup> The estimated standard deviations of the least significant digits are given in parentheses.

Table S3. Atomic coordinates and equivalent isotropic displacement parameters ( $\text{\AA}^2$ ) for  $[\text{Cu}(2,7\text{-DioxoOEiBC})][\text{SbCl}_6] \cdot 0.5 \text{CHCl}_3$ .  $U(\text{eq})$  is defined as one third of the trace of the orthogonalized  $U_{ij}$  tensor.

|       | x          | y         | z         | U(eq) |
|-------|------------|-----------|-----------|-------|
| Cu    | 0.7508(1)  | 0.3386(1) | 0.1284(1) | 0.015 |
| O(1)  | 0.7814(8)  | 0.5488(2) | 0.0536(1) | 0.025 |
| O(2)  | 0.7225(8)  | 0.1832(2) | 0.0284(1) | 0.042 |
| N(1)  | 0.7570(7)  | 0.3977(3) | 0.0907(1) | 0.016 |
| N(2)  | 0.7413(7)  | 0.2599(3) | 0.1006(1) | 0.017 |
| N(3)  | 0.7382(6)  | 0.2806(2) | 0.1653(1) | 0.015 |
| N(4)  | 0.7699(8)  | 0.4158(2) | 0.1562(1) | 0.017 |
| CA1   | 0.7747(9)  | 0.4644(3) | 0.0918(2) | 0.018 |
| CA2   | 0.7379(9)  | 0.3800(3) | 0.0608(1) | 0.016 |
| CA3   | 0.7315(9)  | 0.2634(3) | 0.0691(2) | 0.019 |
| CA4   | 0.7409(9)  | 0.1963(3) | 0.1092(2) | 0.019 |
| CA5   | 0.7295(9)  | 0.2146(3) | 0.1651(2) | 0.017 |
| CA6   | 0.7337(9)  | 0.2990(3) | 0.1957(1) | 0.017 |
| CA7   | 0.7670(9)  | 0.4163(3) | 0.1878(1) | 0.014 |
| CA8   | 0.7914(8)  | 0.4792(3) | 0.1477(2) | 0.018 |
| CB1   | 0.7679(8)  | 0.4921(3) | 0.0602(2) | 0.016 |
| CB2   | 0.7385(9)  | 0.4365(3) | 0.0384(1) | 0.018 |
| C(11) | 0.5927(9)  | 0.4454(3) | 0.0241(2) | 0.021 |
| CB3   | 0.7321(9)  | 0.1960(3) | 0.0557(1) | 0.026 |
| C(12) | 0.4751(8)  | 0.4455(3) | 0.0471(2) | 0.027 |
| CB4   | 0.7511(9)  | 0.1493(4) | 0.0823(2) | 0.020 |
| CB5   | 0.7154(8)  | 0.1900(4) | 0.1969(2) | 0.016 |
| CB6   | 0.7195(7)  | 0.2420(3) | 0.2153(2) | 0.019 |
| CB7   | 0.7861(9)  | 0.4819(3) | 0.1992(2) | 0.020 |
| CB8   | 0.8043(8)  | 0.5204(3) | 0.1751(2) | 0.014 |
| CM1   | 0.7272(9)  | 0.3168(3) | 0.0503(1) | 0.019 |
| CM2   | 0.7335(8)  | 0.1746(3) | 0.1394(2) | 0.019 |
| CM3   | 0.7462(8)  | 0.3624(4) | 0.2058(2) | 0.021 |
| CM4   | 0.7935(8)  | 0.5014(4) | 0.1172(2) | 0.015 |
| C(21) | 0.8499(9)  | 0.4307(4) | 0.0136(2) | 0.022 |
| C(22) | 0.9961(9)  | 0.4224(4) | 0.0255(2) | 0.027 |
| C(31) | 0.9011(10) | 0.1197(4) | 0.0805(2) | 0.030 |
| C(32) | 1.0163(9)  | 0.1687(4) | 0.0804(2) | 0.045 |
| C(41) | 0.6383(9)  | 0.0955(4) | 0.0818(2) | 0.031 |
| C(42) | 0.4899(11) | 0.1216(5) | 0.0830(2) | 0.044 |
| C(51) | 0.7056(8)  | 0.1180(3) | 0.2043(2) | 0.022 |
| C(52) | 0.8470(8)  | 0.0841(4) | 0.2027(2) | 0.028 |
| C(61) | 0.7092(9)  | 0.2422(4) | 0.2501(2) | 0.023 |
| C(62) | 0.5584(9)  | 0.2445(4) | 0.2617(2) | 0.031 |
| C(71) | 0.7906(8)  | 0.4987(4) | 0.2331(2) | 0.020 |

|        |            |           |           |       |
|--------|------------|-----------|-----------|-------|
| C(72)  | 0.9335(9)  | 0.4900(4) | 0.2466(2) | 0.027 |
| C(81)  | 0.8356(8)  | 0.5918(4) | 0.1737(2) | 0.021 |
| C(82)  | 0.9878(8)  | 0.6060(4) | 0.1674(2) | 0.034 |
| Cu'    | 0.2541(1)  | 0.3321(1) | 0.3709(1) | 0.017 |
| O(1')  | 0.3290(8)  | 0.5418(3) | 0.4446(1) | 0.038 |
| O(2')  | 0.1557(7)  | 0.1838(3) | 0.4711(1) | 0.029 |
| N(1')  | 0.2758(8)  | 0.3911(3) | 0.4082(1) | 0.021 |
| N(2')  | 0.2195(7)  | 0.2554(3) | 0.3995(1) | 0.016 |
| N(3')  | 0.2356(7)  | 0.2733(3) | 0.3345(1) | 0.021 |
| N(4')  | 0.2770(6)  | 0.4090(2) | 0.3428(1) | 0.017 |
| C(11') | 0.4228(8)  | 0.4209(3) | 0.4808(2) | 0.030 |
| C(12') | 0.5587(9)  | 0.4164(3) | 0.4633(2) | 0.046 |
| C(21') | 0.1641(9)  | 0.4420(3) | 0.4811(2) | 0.028 |
| CA1'   | 0.2956(7)  | 0.4580(3) | 0.4064(2) | 0.017 |
| C(22') | 0.0316(8)  | 0.4496(3) | 0.4632(2) | 0.037 |
| CA2'   | 0.2726(8)  | 0.3740(3) | 0.4387(2) | 0.019 |
| CA3'   | 0.2149(9)  | 0.2590(3) | 0.4310(2) | 0.018 |
| CA4'   | 0.1893(8)  | 0.1921(3) | 0.3905(2) | 0.017 |
| CA5'   | 0.2070(9)  | 0.2080(4) | 0.3346(2) | 0.015 |
| CA6'   | 0.2386(9)  | 0.2912(3) | 0.3038(2) | 0.017 |
| CA7'   | 0.2734(8)  | 0.4081(4) | 0.3111(2) | 0.019 |
| CA8'   | 0.2918(8)  | 0.4731(3) | 0.3509(2) | 0.020 |
| CB1'   | 0.3104(8)  | 0.4853(4) | 0.4382(2) | 0.027 |
| CB2'   | 0.2920(9)  | 0.4292(4) | 0.4603(2) | 0.024 |
| C(31') | 0.0063(8)  | 0.1224(4) | 0.4164(2) | 0.028 |
| CB3'   | 0.1731(8)  | 0.1952(4) | 0.4440(2) | 0.020 |
| C(32') | -0.1042(9) | 0.1740(3) | 0.4099(2) | 0.035 |
| CB4'   | 0.1554(8)  | 0.1481(4) | 0.4175(2) | 0.018 |
| CB5'   | 0.1932(9)  | 0.1829(3) | 0.3027(2) | 0.021 |
| CB6'   | 0.2139(9)  | 0.2341(4) | 0.2842(2) | 0.023 |
| CB7'   | 0.2841(9)  | 0.4739(4) | 0.2989(2) | 0.022 |
| CB8'   | 0.2948(9)  | 0.5139(4) | 0.3233(2) | 0.025 |
| CM1'   | 0.2423(9)  | 0.3117(4) | 0.4490(2) | 0.020 |
| CM2'   | 0.1869(9)  | 0.1701(4) | 0.3606(2) | 0.018 |
| CM3'   | 0.2582(10) | 0.3533(4) | 0.2929(2) | 0.018 |
| CM4'   | 0.3008(9)  | 0.4954(4) | 0.3812(2) | 0.024 |
| C(41') | 0.2600(9)  | 0.0913(3) | 0.4210(2) | 0.031 |
| C(42') | 0.4081(10) | 0.1117(4) | 0.4234(2) | 0.036 |
| C(51') | 0.1491(8)  | 0.1147(4) | 0.2960(2) | 0.023 |
| C(52') | -0.0069(8) | 0.1060(4) | 0.3012(2) | 0.028 |
| C(61') | 0.2055(9)  | 0.2364(4) | 0.2495(2) | 0.026 |
| C(62') | 0.0643(9)  | 0.2563(5) | 0.2380(2) | 0.041 |
| C(71') | 0.2824(9)  | 0.4885(4) | 0.2651(2) | 0.026 |
| C(72') | 0.4162(9)  | 0.4717(4) | 0.2483(2) | 0.025 |
| C(81') | 0.3002(8)  | 0.5861(4) | 0.3238(2) | 0.031 |
| C(82') | 0.1572(9)  | 0.6170(4) | 0.3263(2) | 0.044 |

|        |            |            |            |       |
|--------|------------|------------|------------|-------|
| Cl(31) | 0.3652(40) | 0.2033(8)  | -0.0159(6) | 0.047 |
| Cl(32) | 0.2866(8)  | 0.2888(3)  | 0.0361(2)  | 0.084 |
| Cl(33) | 0.0822(14) | 0.2564(4)  | -0.0093(3) | 0.094 |
| Cl(41) | 0.3080(7)  | 0.2612(3)  | 0.0412(2)  | 0.110 |
| Cl(42) | 0.3039(30) | 0.3371(14) | -0.0136(7) | 0.062 |
| Cl(43) | 0.3510(20) | 0.2008(7)  | -0.0114(4) | 0.213 |
| C(1S)  | 0.2240(7)  | 0.2729(3)  | -0.0054(1) | 0.111 |
| C(2S)  | 0.3830(30) | 0.2689(12) | 0.0049(6)  | 0.069 |
| Sb     | 0.2677(1)  | 0.3768(1)  | 0.1465(1)  | 0.020 |
| Cl(1)  | 0.3887(2)  | 0.3321(1)  | 0.1889(1)  | 0.034 |
| Cl(2)  | 0.4139(2)  | 0.3161(1)  | 0.1132(1)  | 0.040 |
| Cl(3)  | 0.1475(2)  | 0.4208(1)  | 0.1040(1)  | 0.039 |
| Cl(4)  | 0.1061(2)  | 0.2902(1)  | 0.1484(1)  | 0.038 |
| Cl(5)  | 0.4271(2)  | 0.4652(1)  | 0.1444(1)  | 0.036 |
| Cl(6)  | 0.1286(2)  | 0.4375(1)  | 0.1810(1)  | 0.041 |
| Sb'    | 0.7661(1)  | 0.3729(1)  | 0.3497(1)  | 0.021 |
| Cl(1') | 0.6471(3)  | 0.4578(1)  | 0.3752(1)  | 0.048 |
| Cl(2') | 0.8820(3)  | 0.2870(1)  | 0.3240(1)  | 0.050 |
| Cl(3') | 0.9333(2)  | 0.4492(1)  | 0.3325(1)  | 0.046 |
| Cl(4') | 0.9034(3)  | 0.3533(1)  | 0.3937(1)  | 0.046 |
| Cl(5') | 0.5958(3)  | 0.2981(1)  | 0.3672(1)  | 0.049 |
| Cl(6') | 0.6338(2)  | 0.3929(1)  | 0.3047(1)  | 0.038 |

**Table S4. Bond Lengths [Å] and Angles [deg] for [Cu(trioxoOEHP)][SbCl<sub>6</sub>] $\cdot$ 1.25-(CH<sub>2</sub>Cl<sub>2</sub>).<sup>a</sup>**

---

|             |          |             |          |
|-------------|----------|-------------|----------|
| Cu-N(1)     | 2.041(3) | C(a7)-C(m3) | 1.385(5) |
| Cu-N(2)     | 2.035(3) | C(a8)-C(m4) | 1.385(5) |
| Cu-N(3)     | 2.029(3) | C(b1)-C(b2) | 1.503(5) |
| Cu-N(4)     | 1.997(3) | C(b3)-C(b4) | 1.515(5) |
| N(1)-C(a1)  | 1.375(4) | C(b5)-C(b6) | 1.509(5) |
| N(1)-C(a2)  | 1.356(5) | C(b7)-C(b8) | 1.356(5) |
| N(2)-C(a3)  | 1.374(4) | C(b1)-O(1)  | 1.217(5) |
| N(2)-C(a4)  | 1.364(4) | C(b3)-O(2)  | 1.217(4) |
| N(3)-C(a5)  | 1.375(4) | C(b5)-O(3)  | 1.215(5) |
| N(3)-C(a6)  | 1.362(4) | C(b2)-C(11) | 1.508(6) |
| N(4)-C(a7)  | 1.375(4) | C(b2)-C(21) | 1.620(7) |
| N(4)-C(a8)  | 1.372(4) | C(b4)-C(31) | 1.541(6) |
| C(a1)-C(b1) | 1.486(5) | C(b4)-C(41) | 1.547(6) |
| C(a2)-C(b2) | 1.525(5) | C(b6)-C(51) | 1.536(5) |
| C(a3)-C(b3) | 1.500(5) | C(b6)-C(61) | 1.550(6) |
| C(a4)-C(b4) | 1.521(5) | C(b7)-C(71) | 1.505(5) |
| C(a5)-C(b5) | 1.493(5) | C(b8)-C(81) | 1.505(5) |
| C(a6)-C(b6) | 1.525(5) | C(11)-C(12) | 1.526(8) |
| C(a7)-C(b7) | 1.467(5) | C(21)-C(22) | 1.511(6) |
| C(a8)-C(b8) | 1.462(5) | C(31)-C(32) | 1.543(7) |
| C(a1)-C(m4) | 1.370(5) | C(41)-C(42) | 1.523(7) |
| C(a2)-C(m1) | 1.383(5) | C(51)-C(52) | 1.528(7) |
| C(a3)-C(m1) | 1.370(5) | C(61)-C(62) | 1.520(6) |
| C(a4)-C(m2) | 1.382(5) | C(71)-C(72) | 1.516(6) |
| C(a5)-C(m2) | 1.375(5) | C(81)-C(82) | 1.523(6) |
| C(a6)-C(m3) | 1.368(5) |             |          |



**Table S4. (cont.)**

---

|                  |            |                   |          |
|------------------|------------|-------------------|----------|
| N(1)-Cu-N(2)     | 89.62(11)  | O(1)-C(b1)-C(b2)  | 126.9(3) |
| N(1)-Cu-N(3)     | 179.39(12) | C(a2)-C(b2)-C(11) | 115.0(4) |
| N(1)-Cu-N(4)     | 90.59(11)  | C(a2)-C(b2)-C(21) | 109.1(3) |
| N(2)-Cu-N(3)     | 90.06(11)  | C(a2)-C(b2)-C(b1) | 100.5(3) |
| N(2)-Cu-N(4)     | 179.19(12) | C(b1)-C(b2)-C(11) | 112.2(3) |
| N(3)-Cu-N(4)     | 89.73(11)  | C(b1)-C(b2)-C(21) | 103.6(3) |
| C(a1)-N(1)-Cu    | 123.7(2)   | C(11)-C(b2)-C(21) | 114.9(3) |
| C(a2)-N(1)-Cu    | 127.8(2)   | C(a3)-C(b3)-C(b4) | 106.9(3) |
| C(a3)-N(2)-Cu    | 124.1(2)   | O(2)-C(b3)-C(a3)  | 125.7(3) |
| C(a4)-N(2)-Cu    | 127.2(2)   | O(2)-C(b3)-C(b4)  | 127.4(3) |
| C(a5)-N(3)-Cu    | 124.3(2)   | C(a4)-C(b4)-C(31) | 112.1(3) |
| C(a6)-N(3)-Cu    | 126.9(2)   | C(a4)-C(b4)-C(41) | 112.0(3) |
| C(a7)-N(4)-Cu    | 127.0(2)   | C(a4)-C(b4)-C(b3) | 100.3(3) |
| C(a8)-N(4)-Cu    | 127.6(2)   | C(b3)-C(b4)-C(31) | 110.6(3) |
| C(a1)-N(1)-C(a2) | 108.5(3)   | C(b3)-C(b4)-C(41) | 110.3(3) |
| C(a3)-N(2)-C(a4) | 108.6(3)   | C(31)-C(b4)-C(41) | 111.1(3) |
| C(a5)-N(3)-C(a6) | 108.8(3)   | C(a5)-C(b5)-C(b6) | 107.1(3) |
| C(a7)-N(4)-C(a8) | 105.4(3)   | O(3)-C(b5)-C(a5)  | 125.4(3) |
| N(1)-C(a2)-C(m1) | 124.7(3)   | O(3)-C(b5)-C(b6)  | 127.5(3) |
| N(1)-C(a1)-C(m4) | 128.0(3)   | C(a6)-C(b6)-C(51) | 113.0(3) |
| N(1)-C(a1)-C(b1) | 110.4(3)   | C(a6)-C(b6)-C(61) | 112.1(3) |
| N(1)-C(a2)-C(b2) | 112.9(3)   | C(a6)-C(b6)-C(b5) | 100.4(3) |
| N(2)-C(a3)-C(m1) | 128.8(3)   | C(b5)-C(b6)-C(51) | 110.9(3) |
| N(2)-C(a4)-C(m2) | 124.9(3)   | C(b5)-C(b6)-C(61) | 109.8(3) |
| N(2)-C(a3)-C(b3) | 110.2(3)   | C(51)-C(b6)-C(61) | 110.2(3) |
| N(2)-C(a4)-C(b4) | 114.0(3)   | C(a7)-C(b7)-C(71) | 124.9(3) |
| N(3)-C(a5)-C(m2) | 128.7(3)   | C(a7)-C(b7)-C(b8) | 106.5(3) |

**Table S4. (cont.)**

|                   |          |                   |          |
|-------------------|----------|-------------------|----------|
| N(3)-C(a6)-C(m3)  | 124.9(3) | C(b8)-C(b7)-C(71) | 128.5(3) |
| N(3)-C(a5)-C(b5)  | 110.6(3) | C(a8)-C(b8)-C(81) | 129.4(3) |
| N(3)-C(a6)-C(b6)  | 113.1(3) | C(a8)-C(b8)-C(b7) | 106.4(3) |
| N(4)-C(a7)-C(m3)  | 125.5(3) | C(b7)-C(b8)-C(81) | 129.4(3) |
| N(4)-C(a8)-C(m4)  | 124.8(3) | C(a2)-C(m1)-C(a3) | 124.7(3) |
| N(4)-C(a7)-C(b7)  | 110.7(3) | C(a4)-C(m2)-C(a5) | 124.7(3) |
| N(4)-C(a8)-C(b8)  | 111.1(3) | C(a6)-C(m3)-C(a7) | 125.8(3) |
| C(m4)-C(a1)-C(b1) | 121.5(3) | C(a8)-C(m4)-C(a1) | 125.0(3) |
| C(m1)-C(a2)-C(b2) | 122.4(3) | C(b2)-C(11)-C(12) | 112.8(4) |
| C(m1)-C(a3)-C(b3) | 121.0(3) | C(b2)-C(21)-C(22) | 115.0(4) |
| C(m2)-C(a4)-C(b4) | 121.1(3) | C(b4)-C(31)-C(32) | 114.4(3) |
| C(m2)-C(a5)-C(b5) | 120.7(3) | C(b4)-C(41)-C(42) | 115.2(3) |
| C(m3)-C(a6)-C(b6) | 122.0(3) | C(b6)-C(51)-C(52) | 115.1(3) |
| C(m3)-C(a7)-C(b7) | 123.7(3) | C(b6)-C(61)-C(62) | 114.3(3) |
| C(m4)-C(a8)-C(b8) | 124.2(3) | C(b7)-C(71)-C(72) | 113.3(3) |
| C(a1)-C(b1)-C(b2) | 106.4(3) | C(b8)-C(81)-C(82) | 112.3(3) |
| O(1)-C(b1)- C(a1) | 126.7(3) |                   |          |

---

<sup>a</sup> The estimated standard deviations of the least significant digits are given in parentheses.

Table S5. Bond lengths [Å] for [Cu(2,7-dioxoP)][SbCl<sub>6</sub>] 0.5 CHCl<sub>3</sub>.

| atom-atom    | distance  | atom-atom    | distance  |
|--------------|-----------|--------------|-----------|
| Cu-N(1)      | 2.037(5)  | Cu-N(2)      | 2.020(5)  |
| Cu-N(3)      | 1.998(5)  | Cu-N(4)      | 2.004(5)  |
| N(1)-CA1     | 1.387(8)  | N(1)-CA2     | 1.362(8)  |
| N(2)-CA3     | 1.371(8)  | N(2)-CA4     | 1.360(8)  |
| N(3)-CA5     | 1.363(8)  | N(3)-CA6     | 1.373(8)  |
| N(4)-CA7     | 1.368(8)  | N(4)-CA8     | 1.372(9)  |
| CA1-CB1      | 1.485(9)  | CA2-CB2      | 1.514(9)  |
| CA3-CB3      | 1.503(9)  | CA4-CB4      | 1.519(9)  |
| CA5-CB5      | 1.476(9)  | CA6-CB6      | 1.455(9)  |
| CA7-CB7      | 1.449(9)  | CA8-CB8      | 1.463(9)  |
| CA1-CM4      | 1.351(9)  | CA2-CM1      | 1.381(9)  |
| CA3-CM1      | 1.370(9)  | CA4-CM2      | 1.384(9)  |
| CA5-CM2      | 1.388(9)  | CA6-CM3      | 1.383(9)  |
| CA7-CM3      | 1.374(9)  | CA8-CM4      | 1.401(10) |
| O(1)-CB1     | 1.208(8)  | O(2)-CB3     | 1.216(8)  |
| CB1-CB2      | 1.510(9)  | CB3-CB4      | 1.511(9)  |
| CB5-CB6      | 1.334(9)  | CB7-CB8      | 1.322(10) |
| CB2-C(11)    | 1.550(11) | CB2-C(21)    | 1.527(10) |
| CB4-C(31)    | 1.573(12) | CB4-C(41)    | 1.555(11) |
| CB5-C(51)    | 1.520(9)  | CB6-C(61)    | 1.512(9)  |
| CB7-C(71)    | 1.510(9)  | CB8-C(81)    | 1.502(10) |
| C(11)-C(12)  | 1.510(11) | C(21)-C(22)  | 1.513(11) |
| C(31)-C(32)  | 1.501(12) | C(41)-C(42)  | 1.531(14) |
| C(51)-C(52)  | 1.535(10) | C(61)-C(62)  | 1.542(12) |
| C(71)-C(72)  | 1.511(11) | C(81)-C(82)  | 1.524(11) |
| C(1S)-Cl(31) | 2.03(3)   | C(1S)-Cl(32) | 1.93(3)   |
| C(1S)-Cl(33) | 1.42(3)   | C(1S)-Cl(41) | 2.19(3)   |
| C(1S)-Cl(42) | 1.57(2)   | C(1S)-Cl(43) | 1.95(3)   |
| C(1S)-C(2S)  | 1.60(4)   | C(2S)-Cl(31) | 1.63(3)   |
| C(2S)-Cl(32) | 1.69(3)   | C(2S)-Cl(41) | 1.73(4)   |
| C(2S)-Cl(42) | 1.79(3)   | C(2S)-Cl(43) | 1.60(3)   |
| Cu'-N(1')    | 2.033(6)  | Cu'-N(2')    | 2.033(6)  |
| Cu'-N(3')    | 1.997(6)  | Cu'-N(4')    | 2.012(5)  |
| N(1')-CA1'   | 1.392(9)  | N(1')-CA2'   | 1.371(9)  |
| N(2')-CA3'   | 1.370(8)  | N(2')-CA4'   | 1.393(9)  |
| N(3')-CA5'   | 1.373(9)  | N(3')-CA6'   | 1.383(8)  |
| N(4')-CA7'   | 1.373(9)  | N(4')-CA8'   | 1.372(9)  |
| CA1'-CB1'    | 1.494(10) | CA2'-CB2'    | 1.484(10) |
| CA3'-CB3'    | 1.485(10) | CA4'-CB4'    | 1.514(10) |
| CA5'-CB5'    | 1.483(10) | CA6'-CB6'    | 1.470(10) |
| CA7'-CB7'    | 1.460(10) | CA8'-CB8'    | 1.462(10) |
| CA1'-CM4'    | 1.338(10) | CA2'-CM1'    | 1.389(9)  |

|               |           |               |           |
|---------------|-----------|---------------|-----------|
| CA3'-CM1'     | 1.364(9)  | CA4'-CM2'     | 1.373(10) |
| CA5'-CM2'     | 1.383(10) | CA6'-CM3'     | 1.376(9)  |
| CA7'-CM3'     | 1.386(10) | CA8'-CM4'     | 1.396(11) |
| O(1')-CB1'    | 1.210(9)  | O(2')-CB3'    | 1.212(8)  |
| CB1'-CB2'     | 1.510(10) | CB3'-CB4'     | 1.512(10) |
| CB5'-CB6'     | 1.340(10) | CB7'-CB8'     | 1.345(11) |
| CB2'-C(11')   | 1.553(11) | CB2'-C(21')   | 1.552(11) |
| CB4'-C(31')   | 1.535(12) | CB4'-C(41')   | 1.553(10) |
| CB5'-C(51')   | 1.495(10) | CB6'-C(61')   | 1.507(10) |
| CB7'-C(71')   | 1.497(10) | CB8'-C(81')   | 1.489(10) |
| C(11')-C(12') | 1.517(12) | C(21')-C(22') | 1.506(12) |
| C(32')-C(31') | 1.532(12) | C(41')-C(42') | 1.493(12) |
| C(51')-C(52') | 1.534(10) | C(61')-C(62') | 1.509(12) |
| C(71')-C(72') | 1.522(11) | C(81')-C(82') | 1.523(11) |
| Sb-Cl(1)      | 2.365(2)  | Sb-Cl(2)      | 2.375(2)  |
| Sb-Cl(3)      | 2.359(2)  | Sb-Cl(4)      | 2.371(2)  |
| Sb-Cl(5)      | 2.386(2)  | Sb-Cl(6)      | 2.366(2)  |
| Sb'-Cl(1')    | 2.367(2)  | Sb'-Cl(2')    | 2.370(2)  |
| Sb'-Cl(3')    | 2.371(2)  | Sb'-Cl(4')    | 2.359(2)  |
| Sb'-Cl(5')    | 2.379(2)  | Sb'-Cl(6')    | 2.366(2)  |
| C(11)-H(11B)  | 0.9600    | C(11)-H(11A)  | 0.9600    |
| C(12)-H(12B)  | 0.9600    | C(12)-H(12C)  | 0.9600    |
| C(12)-H(12A)  | 0.9600    | CM1-HM1A      | 0.9600    |
| CM2-HM2A      | 0.9600    | CM3-HM3A      | 0.9600    |
| CM4-HM4A      | 0.9600    | C(21)-H(21A)  | 0.9600    |
| C(21)-H(21B)  | 0.9600    | C(22)-H(22C)  | 0.9600    |
| C(22)-H(22B)  | 0.9600    | C(22)-H(22A)  | 0.9600    |
| C(31)-H(31A)  | 0.9600    | C(31)-H(31B)  | 0.9600    |
| C(32)-H(32A)  | 0.9600    | C(32)-H(32B)  | 0.9600    |
| C(32)-H(32C)  | 0.9600    | C(41)-H(41B)  | 0.9600    |
| C(41)-H(41A)  | 0.9600    | C(42)-H(42B)  | 0.9600    |
| C(42)-H(42A)  | 0.9600    | C(42)-H(42C)  | 0.9600    |
| C(51)-H(51A)  | 0.9600    | C(51)-H(51B)  | 0.9600    |
| C(52)-H(52A)  | 0.9600    | C(52)-H(52B)  | 0.9600    |
| C(52)-H(52C)  | 0.9600    | C(61)-H(61B)  | 0.9600    |
| C(61)-H(61A)  | 0.9600    | C(62)-H(62B)  | 0.9600    |
| C(62)-H(62A)  | 0.9600    | C(62)-H(62C)  | 0.9600    |
| C(71)-H(71A)  | 0.9600    | C(71)-H(71B)  | 0.9600    |
| C(72)-H(72B)  | 0.9600    | C(72)-H(72A)  | 0.9600    |
| C(72)-H(72C)  | 0.9600    | C(81)-H(81A)  | 0.9600    |
| C(81)-H(81B)  | 0.9600    | C(82)-H(82A)  | 0.9600    |
| C(82)-H(82C)  | 0.9600    | C(82)-H(82B)  | 0.9600    |
| C(11')-H(11D) | 0.9600    | C(11')-H(11C) | 0.9600    |
| C(12')-H(12E) | 0.9600    | C(12')-H(12F) | 0.9600    |
| C(12')-H(12D) | 0.9600    | C(21')-H(21C) | 0.9600    |
| C(21')-H(21D) | 0.9600    | C(22')-H(22E) | 0.9600    |

|               |        |               |        |
|---------------|--------|---------------|--------|
| C(22')-H(22F) | 0.9600 | C(22')-H(22D) | 0.9600 |
| C(31')-H(31D) | 0.9600 | C(31')-H(31C) | 0.9600 |
| C(32')-H(32E) | 0.9600 | C(32')-H(32D) | 0.9600 |
| C(32')-H(32F) | 0.9600 | CM1'-HM1B     | 0.9600 |
| CM2'-HM2B     | 0.9600 | CM3'-HM3B     | 0.9600 |
| CM4'-HM4B     | 0.9600 | C(41')-H(41C) | 0.9600 |
| C(41')-H(41D) | 0.9600 | C(42')-H(42F) | 0.9600 |
| C(42')-H(42D) | 0.9600 | C(42')-H(42E) | 0.9600 |
| C(51')-H(51D) | 0.9600 | C(51')-H(51C) | 0.9600 |
| C(52')-H(52F) | 0.9600 | C(52')-H(52E) | 0.9600 |
| C(52')-H(52D) | 0.9600 | C(61')-H(61C) | 0.9600 |
| C(61')-H(61D) | 0.9600 | C(62')-H(62E) | 0.9600 |
| C(62')-H(62F) | 0.9600 | C(62')-H(62D) | 0.9600 |
| C(71')-H(71C) | 0.9600 | C(71')-H(71D) | 0.9600 |
| C(72')-H(72D) | 0.9600 | C(72')-H(72F) | 0.9600 |
| C(72')-H(72E) | 0.9600 | C(81')-H(81D) | 0.9600 |
| C(81')-H(81C) | 0.9600 | C(82')-H(82E) | 0.9600 |
| C(82')-H(82F) | 0.9600 | C(82')-H(82D) | 0.9600 |
| C(1S)-H(1SA)  | 0.9600 | C(2S)-H(2SA)  | 0.9600 |

Symmetry transformations used to generate equivalent atoms:

Table S6. Bond angles [°] for [Cu(2,7-dioxoP)][SbCl<sub>6</sub>] 0.5 CHCl<sub>3</sub>.

| atom-atom-atom  | angle    | atom-atom-atom  | angle    |
|-----------------|----------|-----------------|----------|
| N(1)-Cu-N(2)    | 90.2(2)  | N(1)-Cu-N(3)    | 178.2(3) |
| N(1)-Cu-N(4)    | 90.3(2)  | N(2)-Cu-N(3)    | 89.7(2)  |
| N(2)-Cu-N(4)    | 177.3(3) | N(3)-Cu-N(4)    | 89.9(2)  |
| CA1-N(1)-Cu     | 124.7(4) | CA2-N(1)-Cu     | 126.9(4) |
| CA3-N(2)-Cu     | 123.7(4) | CA4-N(2)-Cu     | 127.6(4) |
| CA5-N(3)-Cu     | 126.6(4) | CA6-N(3)-Cu     | 127.3(5) |
| CA7-N(4)-Cu     | 127.3(4) | CA8-N(4)-Cu     | 127.4(5) |
| CA2-N(1)-CA1    | 108.2(5) | CA4-N(2)-CA3    | 108.7(5) |
| CA5-N(3)-CA6    | 106.1(6) | CA7-N(4)-CA8    | 105.3(6) |
| N(1)-CA2-CM1    | 125.0(6) | N(1)-CA2-CB2    | 113.8(6) |
| N(1)-CA1-CB1    | 110.2(6) | CM4-CA1-N(1)    | 127.0(6) |
| N(2)-CA4-CM2    | 124.6(6) | N(2)-CA4-CB4    | 113.9(5) |
| N(2)-CA3-CB3    | 109.7(6) | CM1-CA3-N(2)    | 129.6(6) |
| N(3)-CA5-CM2    | 126.4(6) | N(3)-CA5-CB5    | 110.1(6) |
| N(3)-CA6-CM3    | 124.2(6) | N(3)-CA6-CB6    | 109.9(6) |
| N(4)-CA7-CM3    | 124.5(6) | N(4)-CA7-CB7    | 110.2(6) |
| N(4)-CA8-CM4    | 124.5(6) | N(4)-CA8-CB8    | 110.3(6) |
| O(1)-CB1-CA1    | 125.8(6) | O(1)-CB1-CB2    | 127.2(6) |
| O(2)-CB3-CA3    | 125.2(7) | O(2)-CB3-CB4    | 127.7(6) |
| CA1-CB1-CB2     | 107.0(5) | CB1-CB2-CA2     | 100.7(5) |
| CB1-CB2-C(21)   | 111.6(6) | CA2-CB2-C(21)   | 113.1(6) |
| CB1-CB2-C(11)   | 109.4(6) | CA2-CB2-C(11)   | 110.1(7) |
| C(21)-CB2-C(11) | 111.4(6) | CM1-CA2-CB2     | 121.1(6) |
| CA3-CM1-CA2     | 124.0(6) | CM1-CA3-CB3     | 120.7(6) |
| CA3-CB3-CB4     | 107.0(6) | CB3-CB4-CA4     | 99.8(5)  |
| CB3-CB4-C(41)   | 111.1(7) | CA4-CB4-C(41)   | 114.8(6) |
| CB3-CB4-C(31)   | 108.8(7) | CA4-CB4-C(31)   | 110.1(7) |
| C(41)-CB4-C(31) | 111.6(6) | CM2-CA4-CB4     | 121.5(6) |
| CA4-CM2-CA5     | 124.8(6) | CM2-CA5-CB5     | 123.5(6) |
| CB6-CB5-CA5     | 106.2(6) | CB6-CB5-C(51)   | 131.2(6) |
| CA5-CB5-C(51)   | 122.5(6) | CB5-CB6-CA6     | 107.6(6) |
| CB5-CB6-C(61)   | 126.5(7) | CA6-CB6-C(61)   | 125.8(6) |
| CM3-CA6-CB6     | 125.8(6) | CA7-CM3-CA6     | 126.5(6) |
| CM3-CA7-CB7     | 125.3(6) | CB8-CB7-CA7     | 107.8(6) |
| CB8-CB7-C(71)   | 128.8(7) | CA7-CB7-C(71)   | 123.3(7) |
| CB7-CB8-CA8     | 106.3(6) | CB7-CB8-C(81)   | 130.0(7) |
| CA8-CB8-C(81)   | 123.6(6) | CM4-CA8-CB8     | 125.1(6) |
| CA1-CM4-CA8     | 125.8(6) | CM4-CA1-CB1     | 122.8(6) |
| CB5-C(51)-C(52) | 112.2(6) | CB6-C(61)-C(62) | 112.9(7) |
| CB7-C(71)-C(72) | 112.2(7) | CB8-C(81)-C(82) | 112.9(7) |
| C(12)-C(11)-CB2 | 114.7(6) | C(22)-C(21)-CB2 | 115.1(6) |
| C(32)-C(31)-CB4 | 115.0(6) | C(42)-C(41)-CB4 | 113.8(7) |

|                     |           |                     |           |
|---------------------|-----------|---------------------|-----------|
| Cl(33)-C(1S)-Cl(42) | 130(2)    | Cl(33)-C(1S)-Cl(32) | 117.0(15) |
| Cl(33)-C(1S)-Cl(31) | 116.9(11) | Cl(42)-C(1S)-Cl(32) | 85.0(13)  |
| Cl(33)-C(1S)-Cl(43) | 114.3(14) | Cl(42)-C(1S)-Cl(43) | 107.6(19) |
| Cl(32)-C(1S)-Cl(43) | 93.2(17)  | Cl(42)-C(1S)-Cl(31) | 102.4(16) |
| Cl(32)-C(1S)-Cl(31) | 96.7(15)  | Cl(33)-C(1S)-Cl(41) | 116.3(14) |
| Cl(42)-C(1S)-Cl(41) | 96.7(16)  | Cl(43)-C(1S)-Cl(41) | 78.7(15)  |
| Cl(31)-C(1S)-Cl(41) | 83.0(13)  | Cl(43)-C(2S)-Cl(32) | 117(2)    |
| Cl(31)-C(2S)-Cl(32) | 125.7(19) | Cl(43)-C(2S)-Cl(41) | 104.0(19) |
| Cl(31)-C(2S)-Cl(41) | 112.3(18) | Cl(43)-C(2S)-Cl(42) | 114(2)    |
| Cl(31)-C(2S)-Cl(42) | 110.9(17) | Cl(32)-C(2S)-Cl(42) | 86.2(13)  |
| Cl(41)-C(2S)-Cl(42) | 107.6(16) | Cl(3)-Sb-Cl(1)      | 179.54(8) |
| Cl(3)-Sb-Cl(6)      | 90.71(9)  | Cl(1)-Sb-Cl(6)      | 89.71(8)  |
| Cl(3)-Sb-Cl(4)      | 89.48(8)  | Cl(1)-Sb-Cl(4)      | 90.32(8)  |
| N(1')-Cu'-N(2')     | 89.9(2)   | N(1')-Cu'-N(3')     | 179.1(3)  |
| N(1')-Cu'-N(4')     | 89.9(2)   | N(2')-Cu'-N(3')     | 89.8(2)   |
| N(2')-Cu'-N(4')     | 176.8(3)  | N(3')-Cu'-N(4')     | 90.5(2)   |
| CA1'-N(1')-Cu'      | 124.3(5)  | CA2'-N(1')-Cu'      | 127.7(5)  |
| CA3'-N(2')-Cu'      | 124.9(5)  | CA4'-N(2')-Cu'      | 126.3(5)  |
| CA5'-N(3')-Cu'      | 127.5(5)  | CA6'-N(3')-Cu'      | 126.7(5)  |
| CA7'-N(4')-Cu'      | 126.3(5)  | CA8'-N(4')-Cu'      | 127.9(5)  |
| CA2'-N(1')-CA1'     | 108.0(6)  | CA3'-N(2')-CA4'     | 108.8(6)  |
| CA5'-N(3')-CA6'     | 105.6(6)  | CA8'-N(4')-CA7'     | 105.8(6)  |
| N(1')-CA1'-CB1'     | 109.6(6)  | CM4'-CA1'-N(1')     | 128.2(7)  |
| N(1')-CA2'-CM1'     | 123.6(6)  | N(1')-CA2'-CB2'     | 114.1(6)  |
| N(2')-CA4'-CB4'     | 112.9(6)  | N(2')-CA3'-CB3'     | 109.8(6)  |
| CM1'-CA3'-N(2')     | 127.4(6)  | CM2'-CA4'-N(2')     | 125.1(7)  |
| N(3')-CA6'-CB6'     | 109.8(6)  | N(3')-CA5'-CM2'     | 125.7(6)  |
| N(3')-CA5'-CB5'     | 110.8(6)  | CM3'-CA6'-N(3')     | 125.6(6)  |
| N(4')-CA8'-CM4'     | 124.3(6)  | N(4')-CA8'-CB8'     | 110.2(7)  |
| N(4')-CA7'-CM3'     | 125.8(6)  | N(4')-CA7'-CB7'     | 110.4(6)  |
| O(1')-CB1'-CA1'     | 125.9(7)  | O(1')-CB1'-CB2'     | 127.5(7)  |
| O(2')-CB3'-CA3'     | 125.1(7)  | O(2')-CB3'-CB4'     | 126.8(7)  |
| CA2'-CB2'-CB1'      | 101.6(6)  | CA2'-CB2'-C(21')    | 113.4(7)  |
| CB1'-CB2'-C(21')    | 109.4(6)  | CA2'-CB2'-C(11')    | 112.2(7)  |
| CB1'-CB2'-C(11')    | 110.5(7)  | C(21')-CB2'-C(11')  | 109.5(6)  |
| CA1'-CB1'-CB2'      | 106.6(7)  | CA4'-CM2'-CA5'      | 125.5(7)  |
| CB3'-CB4'-CA4'      | 100.3(6)  | CB3'-CB4'-C(31')    | 110.5(7)  |
| CA4'-CB4'-C(31')    | 112.7(6)  | CB3'-CB4'-C(41')    | 109.5(6)  |
| CA4'-CB4'-C(41')    | 112.7(6)  | C(31')-CB4'-C(41')  | 110.7(6)  |
| C(22')-C(21')-CB2'  | 113.1(7)  | CA3'-CB3'-CB4'      | 108.1(6)  |
| CB5'-CB6'-CA6'      | 107.9(6)  | CB5'-CB6'-C(61')    | 128.0(7)  |
| CA6'-CB6'-C(61')    | 124.0(7)  | CA1'-CM4'-CA8'      | 125.3(7)  |
| CB8'-CB7'-CA7'      | 106.7(6)  | CB8'-CB7'-C(71')    | 130.5(7)  |
| CA7'-CB7'-C(71')    | 122.8(7)  | CB7'-CB8'-CA8'      | 106.9(7)  |
| CB7'-CB8'-C(81')    | 128.7(7)  | CA8'-CB8'-C(81')    | 124.3(7)  |
| CB8'-C(81')-C(82')  | 112.7(7)  | C(32')-C(31')-CB4'  | 114.8(6)  |

|                     |            |                     |            |
|---------------------|------------|---------------------|------------|
| CA6'-CM3'-CA7'      | 125.1(6)   | CA3'-CM1'-CA2'      | 126.4(6)   |
| CB7'-C(71')-C(72')  | 114.5(7)   | CM4'-CA8'-CB8'      | 125.5(7)   |
| CM4'-CA1'-CB1'      | 122.2(7)   | CM1'-CA2'-CB2'      | 122.1(6)   |
| CB6'-CB5'-CA5'      | 105.8(7)   | CB6'-CB5'-C(51')    | 131.7(7)   |
| CA5'-CB5'-C(51')    | 122.3(7)   | CM2'-CA5'-CB5'      | 123.4(6)   |
| CM3'-CA7'-CB7'      | 123.7(6)   | CM3'-CA6'-CB6'      | 124.6(6)   |
| C(42')-C(41')-CB4'  | 114.7(7)   | CM1'-CA3'-CB3'      | 122.8(6)   |
| CB6'-C(61')-C(62')  | 112.8(7)   | CM2'-CA4'-CB4'      | 121.9(6)   |
| CB5'-C(51')-C(52')  | 111.2(7)   | C(12')-C(11')-CB2'  | 115.2(7)   |
| Cl(6)-Sb-Cl(4)      | 90.15(9)   | Cl(3)-Sb-Cl(2)      | 91.11(9)   |
| Cl(1)-Sb-Cl(2)      | 88.47(9)   | Cl(6)-Sb-Cl(2)      | 177.92(9)  |
| Cl(4)-Sb-Cl(2)      | 90.87(9)   | Cl(3)-Sb-Cl(5)      | 89.70(8)   |
| Cl(1)-Sb-Cl(5)      | 90.49(8)   | Cl(6)-Sb-Cl(5)      | 89.32(8)   |
| Cl(4)-Sb-Cl(5)      | 179.02(9)  | Cl(2)-Sb-Cl(5)      | 89.69(9)   |
| Cl(4')-Sb'-Cl(6')   | 178.50(9)  | Cl(4')-Sb'-Cl(1')   | 91.19(9)   |
| Cl(6')-Sb'-Cl(1')   | 89.68(9)   | Cl(4')-Sb'-Cl(2')   | 89.23(9)   |
| Cl(6')-Sb'-Cl(2')   | 89.91(8)   | Cl(1')-Sb'-Cl(2')   | 179.10(10) |
| Cl(4')-Sb'-Cl(3')   | 89.08(9)   | Cl(6')-Sb'-Cl(3')   | 89.71(8)   |
| Cl(1')-Sb'-Cl(3')   | 89.27(10)  | Cl(2')-Sb'-Cl(3')   | 91.53(10)  |
| Cl(4')-Sb'-Cl(5')   | 91.06(9)   | Cl(6')-Sb'-Cl(5')   | 90.17(9)   |
| Cl(1')-Sb'-Cl(5')   | 89.61(10)  | Cl(2')-Sb'-Cl(5')   | 89.59(10)  |
| Cl(3')-Sb'-Cl(5')   | 178.88(10) | C(12)-C(11)-H(11A)  | 109.00     |
| C(12)-C(11)-H(11B)  | 109.00     | CB2-C(11)-H(11A)    | 109.00     |
| CB2-C(11)-H(11B)    | 109.00     | H(11A)-C(11)-H(11B) | 108.00     |
| H(12A)-C(12)-H(12C) | 109.00     | H(12B)-C(12)-H(12C) | 109.00     |
| H(12A)-C(12)-H(12B) | 109.00     | C(11)-C(12)-H(12C)  | 109.00     |
| C(11)-C(12)-H(12B)  | 109.00     | C(11)-C(12)-H(12A)  | 109.00     |
| CA2-CM1-HM1A        | 118.00     | CA3-CM1-HM1A        | 118.00     |
| CA4-CM2-HM2A        | 118.00     | CA5-CM2-HM2A        | 118.00     |
| CA6-CM3-HM3A        | 117.00     | CA7-CM3-HM3A        | 117.00     |
| CA1-CM4-HM4A        | 117.00     | CA8-CM4-HM4A        | 117.00     |
| CB2-C(21)-H(21A)    | 108.00     | CB2-C(21)-H(21B)    | 108.00     |
| C(22)-C(21)-H(21B)  | 108.00     | H(21A)-C(21)-H(21B) | 107.00     |
| C(22)-C(21)-H(21A)  | 108.00     | C(21)-C(22)-H(22B)  | 109.00     |
| C(21)-C(22)-H(22C)  | 109.00     | C(21)-C(22)-H(22A)  | 109.00     |
| H(22A)-C(22)-H(22C) | 109.00     | H(22B)-C(22)-H(22C) | 109.00     |
| H(22A)-C(22)-H(22B) | 109.00     | CB4-C(31)-H(31A)    | 109.00     |
| H(31A)-C(31)-H(31B) | 108.00     | C(32)-C(31)-H(31A)  | 109.00     |
| CB4-C(31)-H(31B)    | 109.00     | C(32)-C(31)-H(31B)  | 109.00     |
| C(31)-C(32)-H(32B)  | 109.00     | H(32A)-C(32)-H(32C) | 109.00     |
| H(32B)-C(32)-H(32C) | 109.00     | C(31)-C(32)-H(32A)  | 109.00     |
| C(31)-C(32)-H(32C)  | 109.00     | H(32A)-C(32)-H(32B) | 109.00     |
| CB4-C(41)-H(41A)    | 109.00     | CB4-C(41)-H(41B)    | 109.00     |
| C(42)-C(41)-H(41A)  | 109.00     | C(42)-C(41)-H(41B)  | 109.00     |
| H(41A)-C(41)-H(41B) | 108.00     | H(42B)-C(42)-H(42C) | 109.00     |
| H(42A)-C(42)-H(42B) | 109.00     | H(42A)-C(42)-H(42C) | 109.00     |



|                      |        |                      |        |
|----------------------|--------|----------------------|--------|
| C(41)-C(42)-H(42C)   | 109.00 | C(41)-C(42)-H(42A)   | 109.00 |
| C(41)-C(42)-H(42B)   | 109.00 | C(52)-C(51)-H(51A)   | 109.00 |
| CB5-C(51)-H(51A)     | 109.00 | C(52)-C(51)-H(51B)   | 109.00 |
| H(51A)-C(51)-H(51B)  | 108.00 | CB5-C(51)-H(51B)     | 109.00 |
| C(51)-C(52)-H(52C)   | 109.00 | H(52B)-C(52)-H(52C)  | 109.00 |
| C(51)-C(52)-H(52B)   | 109.00 | C(51)-C(52)-H(52A)   | 109.00 |
| H(52A)-C(52)-H(52B)  | 109.00 | H(52A)-C(52)-H(52C)  | 109.00 |
| C(62)-C(61)-H(61B)   | 109.00 | C(62)-C(61)-H(61A)   | 109.00 |
| CB6-C(61)-H(61A)     | 109.00 | CB6-C(61)-H(61B)     | 109.00 |
| H(61A)-C(61)-H(61B)  | 108.00 | C(61)-C(62)-H(62A)   | 109.00 |
| C(61)-C(62)-H(62B)   | 109.00 | H(62A)-C(62)-H(62C)  | 109.00 |
| H(62B)-C(62)-H(62C)  | 109.00 | H(62A)-C(62)-H(62B)  | 109.00 |
| C(61)-C(62)-H(62C)   | 109.00 | C(72)-C(71)-H(71A)   | 109.00 |
| C(72)-C(71)-H(71B)   | 109.00 | H(71A)-C(71)-H(71B)  | 108.00 |
| CB7-C(71)-H(71B)     | 109.00 | CB7-C(71)-H(71A)     | 109.00 |
| C(71)-C(72)-H(72B)   | 109.00 | H(72A)-C(72)-H(72B)  | 109.00 |
| H(72B)-C(72)-H(72C)  | 109.00 | H(72A)-C(72)-H(72C)  | 109.00 |
| C(71)-C(72)-H(72A)   | 109.00 | C(71)-C(72)-H(72C)   | 109.00 |
| C(82)-C(81)-H(81A)   | 109.00 | CB8-C(81)-H(81B)     | 109.00 |
| CB8-C(81)-H(81A)     | 109.00 | H(81A)-C(81)-H(81B)  | 108.00 |
| C(82)-C(81)-H(81B)   | 109.00 | H(82B)-C(82)-H(82C)  | 109.00 |
| H(82A)-C(82)-H(82C)  | 109.00 | C(81)-C(82)-H(82A)   | 109.00 |
| H(82A)-C(82)-H(82B)  | 109.00 | C(81)-C(82)-H(82B)   | 109.00 |
| C(81)-C(82)-H(82C)   | 109.00 | C(12')-C(11')-H(11C) | 109.00 |
| H(11C)-C(11')-H(11D) | 108.00 | CB2'-C(11')-H(11D)   | 109.00 |
| C(12')-C(11')-H(11D) | 109.00 | CB2'-C(11')-H(11C)   | 109.00 |
| C(11')-C(12')-H(12F) | 109.00 | C(11')-C(12')-H(12D) | 109.00 |
| C(11')-C(12')-H(12E) | 109.00 | H(12D)-C(12')-H(12F) | 109.00 |
| H(12E)-C(12')-H(12F) | 109.00 | H(12D)-C(12')-H(12E) | 109.00 |
| C(22')-C(21')-H(21D) | 109.00 | C(22')-C(21')-H(21C) | 109.00 |
| H(21C)-C(21')-H(21D) | 108.00 | CB2'-C(21')-H(21C)   | 109.00 |
| CB2'-C(21')-H(21D)   | 109.00 | H(22D)-C(22')-H(22F) | 109.00 |
| H(22D)-C(22')-H(22E) | 109.00 | H(22E)-C(22')-H(22F) | 109.00 |
| C(21')-C(22')-H(22D) | 109.00 | C(21')-C(22')-H(22F) | 109.00 |
| C(21')-C(22')-H(22E) | 109.00 | CB4'-C(31')-H(31C)   | 109.00 |
| C(32')-C(31')-H(31D) | 109.00 | CB4'-C(31')-H(31D)   | 109.00 |
| H(31C)-C(31')-H(31D) | 108.00 | C(32')-C(31')-H(31C) | 109.00 |
| C(31')-C(32')-H(32F) | 109.00 | H(32D)-C(32')-H(32F) | 109.00 |
| C(31')-C(32')-H(32D) | 109.00 | H(32E)-C(32')-H(32F) | 109.00 |
| H(32D)-C(32')-H(32E) | 109.00 | C(31')-C(32')-H(32E) | 109.00 |
| CA3'-CM1'-HM1B       | 117.00 | CA2'-CM1'-HM1B       | 117.00 |
| CA5'-CM2'-HM2B       | 117.00 | CA4'-CM2'-HM2B       | 117.00 |
| CA6'-CM3'-HM3B       | 117.00 | CA7'-CM3'-HM3B       | 117.00 |
| CA1'-CM4'-HM4B       | 117.00 | CA8'-CM4'-HM4B       | 117.00 |
| CB4'-C(41')-H(41D)   | 109.00 | C(42')-C(41')-H(41D) | 109.00 |
| CB4'-C(41')-H(41C)   | 109.00 | H(41C)-C(41')-H(41D) | 108.00 |

|                      |        |                      |        |
|----------------------|--------|----------------------|--------|
| C(42')-C(41')-H(41C) | 109.00 | H(42D)-C(42')-H(42F) | 109.00 |
| H(42E)-C(42')-H(42F) | 109.00 | H(42D)-C(42')-H(42E) | 109.00 |
| C(41')-C(42')-H(42F) | 109.00 | C(41')-C(42')-H(42E) | 109.00 |
| C(41')-C(42')-H(42D) | 109.00 | CB5'-C(51')-H(51D)   | 109.00 |
| C(52')-C(51')-H(51C) | 109.00 | CB5'-C(51')-H(51C)   | 109.00 |
| H(51C)-C(51')-H(51D) | 108.00 | C(52')-C(51')-H(51D) | 109.00 |
| H(52D)-C(52')-H(52F) | 109.00 | C(51')-C(52')-H(52F) | 109.00 |
| H(52D)-C(52')-H(52E) | 109.00 | C(51')-C(52')-H(52D) | 109.00 |
| H(52E)-C(52')-H(52F) | 109.00 | C(51')-C(52')-H(52E) | 109.00 |
| CB6'-C(61')-H(61C)   | 109.00 | CB6'-C(61')-H(61D)   | 109.00 |
| H(61C)-C(61')-H(61D) | 108.00 | C(62')-C(61')-H(61D) | 109.00 |
| C(62')-C(61')-H(61C) | 109.00 | C(61')-C(62')-H(62D) | 109.00 |
| H(62D)-C(62')-H(62E) | 109.00 | C(61')-C(62')-H(62E) | 109.00 |
| C(61')-C(62')-H(62F) | 109.00 | H(62E)-C(62')-H(62F) | 109.00 |
| H(62D)-C(62')-H(62F) | 109.00 | CB7'-C(71')-H(71D)   | 109.00 |
| C(72')-C(71')-H(71C) | 109.00 | H(71C)-C(71')-H(71D) | 108.00 |
| C(72')-C(71')-H(71D) | 109.00 | CB7'-C(71')-H(71C)   | 109.00 |
| H(72E)-C(72')-H(72F) | 109.00 | H(72D)-C(72')-H(72F) | 109.00 |
| C(71')-C(72')-H(72F) | 109.00 | C(71')-C(72')-H(72E) | 109.00 |
| H(72D)-C(72')-H(72E) | 109.00 | C(71')-C(72')-H(72D) | 109.00 |
| CB8'-C(81')-H(81D)   | 109.00 | H(81C)-C(81')-H(81D) | 108.00 |
| C(82')-C(81')-H(81C) | 109.00 | C(82')-C(81')-H(81D) | 109.00 |
| CB8'-C(81')-H(81C)   | 109.00 | H(82E)-C(82')-H(82F) | 109.00 |
| C(81')-C(82')-H(82D) | 109.00 | H(82D)-C(82')-H(82F) | 109.00 |
| C(81')-C(82')-H(82F) | 109.00 | H(82D)-C(82')-H(82E) | 109.00 |
| C(81')-C(82')-H(82E) | 109.00 | Cl(33)-C(1S)-H(1SA)  | 108.00 |
| Cl(31)-C(1S)-H(1SA)  | 108.00 | Cl(32)-C(1S)-H(1SA)  | 108.00 |
| C(2S)-C(1S)-H(1SA)   | 90.00  | Cl(42)-C(1S)-H(1SA)  | 25.00  |
| Cl(43)-C(1S)-H(1SA)  | 115.00 | C(1S)-C(2S)-H(2SA)   | 164.00 |
| Cl(31)-C(2S)-H(2SA)  | 105.00 | Cl(32)-C(2S)-H(2SA)  | 116.00 |
| Cl(41)-C(2S)-H(2SA)  | 110.00 | Cl(42)-C(2S)-H(2SA)  | 110.00 |
| Cl(43)-C(2S)-H(2SA)  | 110.00 |                      |        |

Symmetry transformations used to generate equivalent atoms:

**Table S7. Anisotropic displacement parameters ( $\text{\AA}^2$ ) for [Cu(trioxoOEHP)][SbCl<sub>6</sub>] $\cdot$ 1.25[CH<sub>2</sub>Cl<sub>2</sub>].<sup>a</sup> The anisotropic displacement factor exponent takes the form:  $-2 \pi^2 [ h^2 a^2 U_{11} + \dots + 2 h k a^* b^* U_{12} ]$**

|       | U11        | U22        | U33        | U23         | U13         | U12         |
|-------|------------|------------|------------|-------------|-------------|-------------|
| Cu    | 0.0090(2)  | 0.0091(2)  | 0.0198(2)  | 0.0005(2)   | -0.0014(2)  | -0.0005(1)  |
| N(1)  | 0.0140(14) | 0.0100(13) | 0.0212(15) | 0.0013(11)  | -0.0018(11) | -0.0016(10) |
| N(2)  | 0.0119(13) | 0.0115(13) | 0.026(2)   | -0.0006(11) | -0.0010(11) | 0.0007(11)  |
| N(3)  | 0.0118(13) | 0.0113(13) | 0.022(2)   | -0.0001(11) | 0.0010(11)  | 0.0010(10)  |
| N(4)  | 0.0129(13) | 0.0154(14) | 0.0153(14) | 0.0003(11)  | -0.0007(11) | -0.0024(11) |
| C(a1) | 0.021(2)   | 0.013(2)   | 0.018(2)   | 0.0026(13)  | -0.0030(14) | -0.0055(13) |
| C(a2) | 0.020(2)   | 0.012(2)   | 0.024(2)   | 0.0014(13)  | -0.0041(14) | -0.0006(13) |
| C(a3) | 0.012(2)   | 0.013(2)   | 0.028(2)   | 0.0002(14)  | -0.0010(14) | 0.0003(12)  |
| C(a4) | 0.010(2)   | 0.015(2)   | 0.029(2)   | 0.0005(14)  | -0.0015(14) | -0.0012(13) |
| C(a5) | 0.015(2)   | 0.011(2)   | 0.026(2)   | -0.0005(13) | 0.0003(14)  | -0.0003(13) |
| C(a6) | 0.017(2)   | 0.012(2)   | 0.023(2)   | -0.0022(13) | 0.0008(14)  | 0.0013(12)  |
| C(a7) | 0.009(2)   | 0.021(2)   | 0.016(2)   | -0.0001(13) | -0.0003(12) | 0.0023(12)  |
| C(a8) | 0.012(2)   | 0.020(2)   | 0.015(2)   | 0.0006(13)  | -0.0001(12) | -0.0026(13) |
| C(b1) | 0.020(2)   | 0.017(2)   | 0.027(2)   | 0.0020(14)  | -0.0051(15) | -0.0037(14) |
| C(b2) | 0.020(2)   | 0.011(2)   | 0.051(3)   | 0.004(2)    | -0.013(2)   | -0.0034(14) |
| C(b3) | 0.014(2)   | 0.016(2)   | 0.040(2)   | -0.001(2)   | -0.003(2)   | -0.0011(13) |
| C(b4) | 0.011(2)   | 0.014(2)   | 0.047(2)   | 0.002(2)    | -0.003(2)   | 0.0003(13)  |
| C(b5) | 0.017(2)   | 0.013(2)   | 0.028(2)   | -0.0009(14) | 0.0001(14)  | 0.0004(13)  |
| C(b6) | 0.014(2)   | 0.012(2)   | 0.035(2)   | -0.0007(15) | -0.0008(15) | 0.0009(12)  |
| C(b7) | 0.013(2)   | 0.024(2)   | 0.015(2)   | 0.0011(13)  | -0.0006(13) | -0.0003(13) |
| C(b8) | 0.012(2)   | 0.025(2)   | 0.016(2)   | 0.0009(14)  | 0.0002(13)  | -0.0018(13) |
| C(m1) | 0.014(2)   | 0.013(2)   | 0.029(2)   | -0.0011(14) | -0.0041(14) | 0.0031(13)  |
| C(m2) | 0.012(2)   | 0.012(2)   | 0.036(2)   | 0.0014(15)  | 0.0014(14)  | -0.0035(12) |
| C(m3) | 0.013(2)   | 0.015(2)   | 0.025(2)   | -0.0004(14) | 0.0001(13)  | 0.0049(12)  |
| C(m4) | 0.014(2)   | 0.019(2)   | 0.018(2)   | 0.0003(13)  | 0.0006(13)  | -0.0070(13) |
| O(1)  | 0.0239(14) | 0.0156(13) | 0.042(2)   | 0.0010(12)  | -0.0035(12) | -0.0078(10) |

**Table S7. (cont.)**

|       |            |            |           |            |             |             |
|-------|------------|------------|-----------|------------|-------------|-------------|
| O(2)  | 0.0164(13) | 0.0177(13) | 0.073(2)  | 0.0054(14) | -0.0039(14) | 0.0046(11)  |
| O(3)  | 0.0204(13) | 0.0114(12) | 0.051(2)  | 0.0026(12) | 0.0010(12)  | -0.0035(10) |
| C(11) | 0.022(2)   | 0.018(2)   | 0.067(3)  | -0.007(2)  | -0.007(2)   | -0.001(2)   |
| C(21) | 0.025(2)   | 0.020(2)   | 0.060(3)  | 0.018(2)   | -0.006(2)   | -0.005(2)   |
| C(31) | 0.018(2)   | 0.024(2)   | 0.054(3)  | 0.000(2)   | -0.011(2)   | -0.0014(15) |
| C(41) | 0.011(2)   | 0.022(2)   | 0.060(3)  | 0.004(2)   | 0.006(2)    | -0.0001(14) |
| C(51) | 0.024(2)   | 0.014(2)   | 0.050(3)  | -0.009(2)  | 0.008(2)    | 0.0002(14)  |
| C(61) | 0.026(2)   | 0.014(2)   | 0.041(2)  | 0.008(2)   | -0.005(2)   | 0.0014(14)  |
| C(71) | 0.010(2)   | 0.026(2)   | 0.025(2)  | 0.000(2)   | 0.0004(14)  | 0.0013(14)  |
| C(81) | 0.013(2)   | 0.026(2)   | 0.027(2)  | 0.000(2)   | 0.0001(14)  | -0.0053(14) |
| C(12) | 0.026(2)   | 0.028(2)   | 0.093(4)  | -0.030(3)  | 0.015(2)    | -0.002(2)   |
| C(22) | 0.035(2)   | 0.039(3)   | 0.050(3)  | 0.012(2)   | -0.002(2)   | -0.001(2)   |
| C(32) | 0.042(3)   | 0.047(3)   | 0.043(3)  | 0.001(2)   | -0.007(2)   | -0.002(2)   |
| C(42) | 0.033(2)   | 0.052(3)   | 0.047(3)  | -0.002(2)  | 0.011(2)    | 0.001(2)    |
| C(52) | 0.041(3)   | 0.031(2)   | 0.043(3)  | -0.013(2)  | 0.011(2)    | -0.006(2)   |
| C(62) | 0.053(3)   | 0.027(2)   | 0.035(2)  | 0.007(2)   | -0.005(2)   | 0.000(2)    |
| C(72) | 0.032(2)   | 0.040(2)   | 0.029(2)  | 0.004(2)   | -0.005(2)   | 0.014(2)    |
| C(82) | 0.032(2)   | 0.036(2)   | 0.030(2)  | -0.009(2)  | -0.007(2)   | -0.009(2)   |
| Sb    | 0.0239(1)  | 0.0254(1)  | 0.0161(1) | -0.0020(1) | -0.0023(1)  | 0.0025(1)   |
| Cl(1) | 0.0358(5)  | 0.0325(5)  | 0.0317(5) | 0.0064(4)  | -0.0105(4)  | 0.0019(4)   |
| Cl(2) | 0.0325(6)  | 0.0569(7)  | 0.0412(6) | 0.0092(5)  | 0.0103(5)   | 0.0117(5)   |
| Cl(3) | 0.0604(7)  | 0.0305(5)  | 0.0313(6) | -0.0003(4) | -0.0086(5)  | -0.0136(5)  |
| Cl(4) | 0.0516(7)  | 0.0445(6)  | 0.0245(5) | 0.0053(4)  | -0.0065(5)  | 0.0143(5)   |
| Cl(5) | 0.0397(6)  | 0.0725(9)  | 0.0412(7) | 0.0078(6)  | 0.0165(5)   | 0.0138(6)   |
| Cl(6) | 0.0652(8)  | 0.0393(6)  | 0.0442(7) | -0.0149(5) | -0.0246(6)  | 0.0011(6)   |

<sup>a</sup> The estimated standard deviations of the least significant digits are given in parentheses.

Table S8. Anisotropic displacement parameters ( $\text{\AA}^2$ ) for  $[\text{Cu}(2,7\text{-DioxoOEiBC})[\text{SbCl}_6] \cdot 0.5 \text{CHCl}_3$ . The anisotropic displacement factor exponent takes the form:  $-2\pi^2[h^2a^2U_{11} + \dots + 2hka^*b^*U_{12}]$

|       | $U_{11}$ | $U_{22}$ | $U_{33}$ | $U_{23}$ | $U_{13}$ | $U_{12}$ |
|-------|----------|----------|----------|----------|----------|----------|
| Cu    | 0.0190   | 0.0150   | 0.0100   | 0.0000   | -0.0010  | 0.0010   |
| O(1)  | 0.0370   | 0.0160   | 0.0210   | 0.0040   | -0.0020  | -0.0040  |
| O(2)  | 0.0970   | 0.0220   | 0.0080   | -0.0020  | 0.0070   | -0.0070  |
| N(1)  | 0.0150   | 0.0160   | 0.0160   | -0.0030  | 0.0020   | -0.0030  |
| N(2)  | 0.0240   | 0.0120   | 0.0140   | 0.0000   | -0.0090  | -0.0020  |
| N(3)  | 0.0130   | 0.0190   | 0.0120   | -0.0010  | 0.0020   | -0.0050  |
| N(4)  | 0.0190   | 0.0150   | 0.0170   | -0.0010  | -0.0030  | 0.0000   |
| CA1   | 0.0250   | 0.0100   | 0.0190   | 0.0010   | 0.0000   | 0.0060   |
| CA2   | 0.0110   | 0.0230   | 0.0150   | 0.0010   | -0.0030  | 0.0050   |
| CA3   | 0.0220   | 0.0230   | 0.0130   | -0.0060  | -0.0010  | -0.0020  |
| CA4   | 0.0230   | 0.0190   | 0.0160   | 0.0030   | 0.0000   | 0.0000   |
| CA5   | 0.0190   | 0.0190   | 0.0130   | 0.0060   | 0.0000   | -0.0020  |
| CA6   | 0.0110   | 0.0280   | 0.0120   | 0.0020   | -0.0020  | -0.0030  |
| CA7   | 0.0100   | 0.0260   | 0.0070   | 0.0010   | 0.0010   | 0.0040   |
| CA8   | 0.0150   | 0.0190   | 0.0210   | -0.0050  | 0.0040   | -0.0040  |
| CB1   | 0.0140   | 0.0180   | 0.0170   | 0.0000   | -0.0010  | 0.0040   |
| CB2   | 0.0260   | 0.0180   | 0.0090   | 0.0010   | 0.0050   | -0.0030  |
| C(11) | 0.0280   | 0.0180   | 0.0180   | 0.0050   | -0.0050  | 0.0030   |
| CB3   | 0.0360   | 0.0210   | 0.0200   | 0.0010   | 0.0110   | 0.0030   |
| C(12) | 0.0310   | 0.0210   | 0.0280   | 0.0040   | -0.0070  | -0.0020  |
| CB4   | 0.0300   | 0.0150   | 0.0140   | 0.0010   | -0.0010  | 0.0040   |
| CB5   | 0.0110   | 0.0170   | 0.0200   | 0.0070   | 0.0040   | 0.0010   |
| CB6   | 0.0180   | 0.0270   | 0.0110   | 0.0010   | -0.0060  | -0.0010  |
| CB7   | 0.0180   | 0.0260   | 0.0160   | -0.0110  | -0.0040  | 0.0020   |
| CB8   | 0.0090   | 0.0150   | 0.0180   | -0.0050  | 0.0020   | 0.0000   |
| CM1   | 0.0300   | 0.0150   | 0.0120   | -0.0040  | 0.0000   | 0.0030   |
| CM2   | 0.0280   | 0.0140   | 0.0160   | 0.0040   | 0.0020   | 0.0030   |
| CM3   | 0.0170   | 0.0360   | 0.0090   | -0.0060  | 0.0000   | 0.0030   |
| CM4   | 0.0160   | 0.0130   | 0.0160   | 0.0000   | -0.0030  | -0.0020  |
| C(21) | 0.0380   | 0.0150   | 0.0130   | 0.0020   | 0.0020   | -0.0070  |
| C(22) | 0.0340   | 0.0250   | 0.0220   | 0.0020   | 0.0050   | 0.0010   |
| C(31) | 0.0430   | 0.0120   | 0.0350   | -0.0100  | -0.0010  | 0.0090   |
| C(32) | 0.0360   | 0.0390   | 0.0590   | -0.0250  | 0.0070   | 0.0060   |
| C(41) | 0.0520   | 0.0220   | 0.0180   | -0.0040  | -0.0030  | -0.0090  |
| C(42) | 0.0440   | 0.0470   | 0.0410   | -0.0130  | 0.0070   | -0.0150  |
| C(51) | 0.0260   | 0.0260   | 0.0140   | 0.0060   | -0.0070  | -0.0030  |
| C(52) | 0.0340   | 0.0300   | 0.0190   | 0.0060   | 0.0070   | 0.0050   |
| C(61) | 0.0300   | 0.0300   | 0.0100   | 0.0060   | -0.0010  | -0.0050  |
| C(62) | 0.0220   | 0.0430   | 0.0290   | 0.0070   | 0.0000   | 0.0010   |
| C(71) | 0.0170   | 0.0270   | 0.0160   | -0.0070  | -0.0060  | 0.0020   |

|        |        |        |        |         |         |         |
|--------|--------|--------|--------|---------|---------|---------|
| C(72)  | 0.0310 | 0.0320 | 0.0170 | -0.0030 | -0.0030 | 0.0070  |
| C(81)  | 0.0200 | 0.0190 | 0.0230 | -0.0070 | 0.0020  | -0.0060 |
| C(82)  | 0.0250 | 0.0410 | 0.0350 | -0.0050 | 0.0070  | -0.0050 |
| Cu'    | 0.0200 | 0.0170 | 0.0130 | 0.0020  | 0.0020  | -0.0010 |
| O(1')  | 0.0680 | 0.0190 | 0.0270 | -0.0040 | 0.0030  | -0.0100 |
| O(2')  | 0.0520 | 0.0220 | 0.0120 | 0.0070  | 0.0000  | -0.0010 |
| N(1')  | 0.0230 | 0.0180 | 0.0220 | 0.0000  | 0.0060  | 0.0000  |
| N(2')  | 0.0170 | 0.0160 | 0.0150 | 0.0000  | -0.0090 | -0.0010 |
| N(3')  | 0.0210 | 0.0310 | 0.0110 | 0.0010  | 0.0030  | 0.0100  |
| N(4')  | 0.0120 | 0.0260 | 0.0140 | 0.0120  | 0.0020  | 0.0100  |
| C(11') | 0.0440 | 0.0210 | 0.0250 | -0.0020 | -0.0080 | -0.0030 |
| C(12') | 0.0450 | 0.0400 | 0.0520 | -0.0050 | -0.0120 | 0.0010  |
| C(21') | 0.0410 | 0.0170 | 0.0260 | -0.0020 | 0.0060  | 0.0010  |
| CA1'   | 0.0190 | 0.0100 | 0.0230 | -0.0030 | 0.0000  | 0.0000  |
| C(22') | 0.0390 | 0.0350 | 0.0370 | -0.0070 | 0.0090  | 0.0030  |
| CA2'   | 0.0130 | 0.0180 | 0.0250 | -0.0010 | 0.0080  | -0.0030 |
| CA3'   | 0.0250 | 0.0170 | 0.0120 | -0.0010 | -0.0060 | 0.0010  |
| CA4'   | 0.0190 | 0.0120 | 0.0210 | 0.0010  | -0.0020 | 0.0010  |
| CA5'   | 0.0150 | 0.0090 | 0.0220 | -0.0040 | 0.0030  | -0.0020 |
| CA6'   | 0.0020 | 0.0320 | 0.0170 | 0.0030  | -0.0010 | -0.0030 |
| CA7'   | 0.0060 | 0.0260 | 0.0260 | 0.0100  | 0.0030  | 0.0030  |
| CA8'   | 0.0150 | 0.0130 | 0.0310 | 0.0080  | 0.0050  | 0.0020  |
| CB1'   | 0.0300 | 0.0290 | 0.0210 | 0.0020  | 0.0020  | 0.0070  |
| CB2'   | 0.0420 | 0.0140 | 0.0160 | -0.0030 | 0.0020  | 0.0000  |
| C(31') | 0.0380 | 0.0110 | 0.0340 | 0.0000  | 0.0040  | -0.0070 |
| CB3'   | 0.0240 | 0.0210 | 0.0140 | 0.0020  | 0.0040  | 0.0040  |
| C(32') | 0.0350 | 0.0380 | 0.0310 | 0.0100  | 0.0020  | -0.0090 |
| CB4'   | 0.0310 | 0.0170 | 0.0060 | -0.0040 | -0.0040 | 0.0030  |
| CB5'   | 0.0170 | 0.0330 | 0.0140 | -0.0090 | 0.0060  | -0.0030 |
| CB6'   | 0.0100 | 0.0400 | 0.0190 | -0.0030 | 0.0000  | -0.0040 |
| CB7'   | 0.0090 | 0.0360 | 0.0210 | 0.0110  | -0.0010 | -0.0010 |
| CB8'   | 0.0160 | 0.0210 | 0.0390 | 0.0110  | 0.0070  | 0.0050  |
| CM1'   | 0.0200 | 0.0240 | 0.0150 | -0.0020 | -0.0030 | -0.0030 |
| CM2'   | 0.0200 | 0.0160 | 0.0190 | -0.0040 | -0.0020 | -0.0020 |
| CM3'   | 0.0090 | 0.0340 | 0.0120 | 0.0050  | 0.0040  | 0.0010  |
| CM4'   | 0.0290 | 0.0100 | 0.0330 | 0.0030  | 0.0090  | -0.0020 |
| C(41') | 0.0370 | 0.0240 | 0.0310 | 0.0020  | -0.0060 | 0.0060  |
| C(42') | 0.0410 | 0.0380 | 0.0290 | 0.0040  | -0.0060 | 0.0080  |
| C(51') | 0.0230 | 0.0310 | 0.0160 | -0.0110 | 0.0060  | -0.0040 |
| C(52') | 0.0240 | 0.0280 | 0.0310 | -0.0080 | -0.0030 | 0.0010  |
| C(61') | 0.0170 | 0.0420 | 0.0190 | 0.0030  | -0.0010 | -0.0010 |
| C(62') | 0.0250 | 0.0880 | 0.0110 | 0.0100  | -0.0090 | -0.0120 |
| C(71') | 0.0250 | 0.0290 | 0.0240 | 0.0140  | 0.0020  | -0.0010 |
| C(72') | 0.0260 | 0.0340 | 0.0160 | 0.0070  | 0.0000  | -0.0080 |
| C(81') | 0.0260 | 0.0270 | 0.0400 | 0.0160  | 0.0090  | -0.0050 |
| C(82') | 0.0450 | 0.0220 | 0.0650 | 0.0110  | 0.0110  | 0.0050  |

|        |        |        |        |         |         |         |
|--------|--------|--------|--------|---------|---------|---------|
| Cl(31) | 0.0560 | 0.0300 | 0.0540 | -0.0080 | 0.0190  | -0.0040 |
| Cl(32) | 0.0900 | 0.0780 | 0.0830 | -0.0430 | -0.0040 | -0.0210 |
| Cl(33) | 0.1020 | 0.0640 | 0.1150 | -0.0460 | -0.0620 | 0.0120  |
| Cl(41) | 0.1430 | 0.1160 | 0.0720 | 0.0190  | 0.0260  | 0.0050  |
| Cl(42) | 0.0630 | 0.0660 | 0.0560 | 0.0060  | 0.0030  | 0.0030  |
| Cl(43) | 0.2800 | 0.1690 | 0.1900 | -0.0460 | 0.0640  | -0.0690 |
| C(1S)  | 0.2200 | 0.0110 | 0.1030 | -0.0110 | 0.0800  | -0.0210 |
| C(2S)  | 0.0480 | 0.0800 | 0.0800 | 0.0100  | -0.0130 | 0.0000  |
| Sb     | 0.0170 | 0.0260 | 0.0180 | -0.0010 | 0.0010  | 0.0020  |
| Cl(1)  | 0.0290 | 0.0500 | 0.0220 | 0.0100  | -0.0020 | 0.0030  |
| Cl(2)  | 0.0420 | 0.0460 | 0.0320 | -0.0030 | 0.0160  | 0.0130  |
| Cl(3)  | 0.0350 | 0.0490 | 0.0340 | 0.0080  | -0.0130 | 0.0030  |
| Cl(4)  | 0.0390 | 0.0430 | 0.0310 | -0.0020 | 0.0010  | -0.0170 |
| Cl(5)  | 0.0300 | 0.0320 | 0.0460 | 0.0060  | -0.0040 | -0.0070 |
| Cl(6)  | 0.0270 | 0.0590 | 0.0380 | -0.0230 | 0.0030  | 0.0080  |
| Sb'    | 0.0200 | 0.0250 | 0.0180 | -0.0010 | -0.0030 | 0.0030  |
| Cl(1') | 0.0440 | 0.0430 | 0.0560 | -0.0240 | 0.0070  | 0.0090  |
| Cl(2') | 0.0470 | 0.0560 | 0.0470 | -0.0210 | -0.0150 | 0.0290  |
| Cl(3') | 0.0250 | 0.0580 | 0.0560 | 0.0250  | -0.0030 | -0.0090 |
| Cl(4') | 0.0620 | 0.0440 | 0.0320 | 0.0030  | -0.0230 | -0.0010 |
| Cl(5') | 0.0440 | 0.0410 | 0.0630 | 0.0120  | 0.0000  | -0.0140 |
| Cl(6') | 0.0320 | 0.0480 | 0.0330 | 0.0000  | -0.0140 | 0.0080  |

**Table S9. Hydrogen coordinates and isotropic displacement parameters (Å<sup>2</sup>) for [Cu(trioxoOEHF)][SbCl<sub>6</sub>]·1.25[CH<sub>2</sub>Cl<sub>2</sub>].<sup>a</sup>**

|       | x           | y           | z           | U(eq) |
|-------|-------------|-------------|-------------|-------|
| H(m1) | 1.07907(11) | 0.10763(11) | 0.2955(4)   | 0.022 |
| H(m2) | 1.08755(11) | 0.30391(11) | 0.2053(4)   | 0.024 |
| H(m3) | 0.88987(11) | 0.31101(11) | 0.1834(4)   | 0.021 |
| H(m4) | 0.88314(11) | 0.11380(11) | 0.2005(4)   | 0.020 |
| H(1A) | 1.01390(14) | 0.00931(13) | 0.2204(6)   | 0.043 |
| H(1B) | 1.05600(14) | 0.03621(13) | 0.2431(6)   | 0.043 |
| H(2A) | 0.98167(13) | 0.08332(13) | 0.5038(5)   | 0.042 |
| H(2B) | 0.98158(13) | 0.03392(13) | 0.4718(5)   | 0.042 |
| H(4A) | 1.15386(12) | 0.27009(13) | 0.1113(5)   | 0.037 |
| H(4B) | 1.18041(12) | 0.22791(13) | 0.1343(5)   | 0.037 |
| H(5A) | 0.95901(13) | 0.40792(12) | 0.2552(5)   | 0.035 |
| H(5B) | 0.91792(13) | 0.37930(12) | 0.2731(5)   | 0.035 |
| H(6A) | 0.92211(13) | 0.36776(12) | 0.0105(5)   | 0.033 |
| H(6B) | 0.96588(13) | 0.39233(12) | -0.0021(5)  | 0.033 |
| H(7A) | 0.81953(11) | 0.29266(12) | 0.2246(4)   | 0.025 |
| H(7B) | 0.78728(11) | 0.25430(12) | 0.2068(4)   | 0.025 |
| H(8A) | 0.78429(11) | 0.17787(12) | 0.1994(4)   | 0.026 |
| H(8B) | 0.81349(11) | 0.13825(12) | 0.2360(4)   | 0.026 |
| H(1C) | 1.0433(11)  | 0.0251(6)   | -0.0008(9)  | 0.074 |
| H(1D) | 1.0427(11)  | 0.0745(6)   | 0.0337(7)   | 0.074 |
| H(1E) | 0.99933(15) | 0.0496(13)  | 0.0123(11)  | 0.074 |
| H(2C) | 1.03510(15) | 0.0484(12)  | 0.6340(11)  | 0.062 |
| H(2D) | 1.0558(5)   | 0.0823(4)   | 0.5312(34)  | 0.062 |
| H(2E) | 1.0569(5)   | 0.0332(8)   | 0.4924(25)  | 0.062 |
| H(4C) | 1.1521(7)   | 0.2292(10)  | -0.0952(8)  | 0.066 |
| H(4D) | 1.1054(5)   | 0.2321(10)  | -0.0336(21) | 0.066 |
| H(4E) | 1.1326(11)  | 0.1901(2)   | -0.0119(16) | 0.066 |



**Table S9. (cont.)**

|       |            |            |             |       |
|-------|------------|------------|-------------|-------|
| H(5C) | 0.9505(9)  | 0.3880(7)  | 0.4938(6)   | 0.057 |
| H(5D) | 0.9938(2)  | 0.3691(11) | 0.4351(11)  | 0.057 |
| H(5E) | 0.9534(10) | 0.3393(4)  | 0.4514(14)  | 0.057 |
| H(6C) | 0.9603(11) | 0.3490(5)  | -0.1977(5)  | 0.057 |
| H(6D) | 0.9504(8)  | 0.3086(5)  | -0.1038(22) | 0.057 |
| H(6E) | 0.9965(3)  | 0.3290(9)  | -0.1026(22) | 0.057 |
| H(7C) | 0.7818(7)  | 0.2991(8)  | 0.0108(6)   | 0.051 |
| H(7D) | 0.8001(10) | 0.2547(2)  | -0.0396(8)  | 0.051 |
| H(7E) | 0.8311(4)  | 0.2940(9)  | -0.0203(11) | 0.051 |
| H(8C) | 0.7806(6)  | 0.1276(8)  | 0.0150(9)   | 0.049 |
| H(8D) | 0.8306(5)  | 0.1304(9)  | -0.0059(13) | 0.049 |
| H(8E) | 0.8015(10) | 0.1701(2)  | -0.0426(6)  | 0.049 |

---

<sup>a</sup> The estimated standard deviations of the least significant digits are given in parentheses.

Table S10. Fixed atomic coordinates for hydrogen atoms of [Cu(2,7-dioxoP)][SbCl<sub>6</sub>] 0.5 CHCl<sub>3</sub>

|        | x       | y       | z       | U(eq) |
|--------|---------|---------|---------|-------|
| HM1A   | 0.71610 | 0.30995 | 0.02854 | 0.023 |
| HM2A   | 0.73096 | 0.12854 | 0.14277 | 0.023 |
| HM3A   | 0.73965 | 0.36942 | 0.22765 | 0.025 |
| HM4A   | 0.80972 | 0.54691 | 0.11404 | 0.018 |
| H(11A) | 0.57720 | 0.41110 | 0.00951 | 0.026 |
| H(11B) | 0.59108 | 0.48568 | 0.01295 | 0.026 |
| H(12A) | 0.38889 | 0.45122 | 0.03642 | 0.040 |
| H(12B) | 0.47381 | 0.40493 | 0.05801 | 0.040 |
| H(12C) | 0.48786 | 0.48042 | 0.06150 | 0.040 |
| H(21A) | 0.84682 | 0.46892 | 0.00094 | 0.026 |
| H(21B) | 0.82797 | 0.39426 | 0.00068 | 0.026 |
| H(22A) | 1.05889 | 0.41918 | 0.00839 | 0.041 |
| H(22B) | 1.02064 | 0.45918 | 0.03796 | 0.041 |
| H(22C) | 1.00155 | 0.38358 | 0.03770 | 0.041 |
| H(31A) | 0.90793 | 0.09397 | 0.06209 | 0.036 |
| H(31B) | 0.91394 | 0.09114 | 0.09777 | 0.036 |
| H(32A) | 1.10374 | 0.14663 | 0.07926 | 0.067 |
| H(32B) | 1.00636 | 0.19683 | 0.06288 | 0.067 |
| H(32C) | 1.01244 | 0.19397 | 0.09899 | 0.067 |
| H(41A) | 0.65259 | 0.06714 | 0.09909 | 0.037 |
| H(41B) | 0.64928 | 0.07018 | 0.06337 | 0.037 |
| H(42A) | 0.42589 | 0.08594 | 0.08262 | 0.066 |
| H(42B) | 0.47706 | 0.14608 | 0.10163 | 0.066 |
| H(42C) | 0.47371 | 0.14915 | 0.06550 | 0.066 |
| H(51A) | 0.64350 | 0.09765 | 0.18997 | 0.026 |
| H(51B) | 0.66774 | 0.11271 | 0.22463 | 0.026 |
| H(52A) | 0.83604 | 0.03889 | 0.20751 | 0.041 |
| H(52B) | 0.88445 | 0.08850 | 0.18229 | 0.041 |
| H(52C) | 0.90895 | 0.10371 | 0.21730 | 0.041 |
| H(61A) | 0.75832 | 0.27915 | 0.25801 | 0.028 |
| H(61B) | 0.75313 | 0.20385 | 0.25803 | 0.028 |
| H(62A) | 0.55761 | 0.24454 | 0.28385 | 0.047 |
| H(62B) | 0.51444 | 0.28324 | 0.25423 | 0.047 |
| H(62C) | 0.50919 | 0.20715 | 0.25425 | 0.047 |
| H(71A) | 0.72647 | 0.47152 | 0.24405 | 0.024 |
| H(71B) | 0.76194 | 0.54297 | 0.23582 | 0.024 |
| H(72A) | 0.93186 | 0.50115 | 0.26810 | 0.040 |
| H(72B) | 0.96185 | 0.44558 | 0.24430 | 0.040 |
| H(72C) | 0.99767 | 0.51774 | 0.23599 | 0.040 |
| H(81A) | 0.80970 | 0.61147 | 0.19293 | 0.025 |
| H(81B) | 0.78052 | 0.61124 | 0.15775 | 0.025 |
| H(82A) | 1.00203 | 0.65212 | 0.16674 | 0.051 |

|        |          |         |         |       |
|--------|----------|---------|---------|-------|
| H(82B) | 1.04340  | 0.58754 | 0.18352 | 0.051 |
| H(82C) | 1.01392  | 0.58730 | 0.14796 | 0.051 |
| HM1B   | 0.24049  | 0.30515 | 0.47092 | 0.024 |
| HM2B   | 0.16986  | 0.12465 | 0.35746 | 0.022 |
| HM3B   | 0.26160  | 0.35908 | 0.27094 | 0.022 |
| HM4B   | 0.31160  | 0.54131 | 0.38422 | 0.029 |
| H(11C) | 0.42793  | 0.45701 | 0.49476 | 0.036 |
| H(11D) | 0.41202  | 0.38228 | 0.49297 | 0.036 |
| H(12D) | 0.63357  | 0.41137 | 0.47767 | 0.068 |
| H(12E) | 0.55618  | 0.37966 | 0.44968 | 0.068 |
| H(12F) | 0.57229  | 0.45532 | 0.45149 | 0.068 |
| H(21C) | 0.15404  | 0.40657 | 0.49532 | 0.034 |
| H(21D) | 0.17993  | 0.48072 | 0.49292 | 0.034 |
| H(22D) | -0.04356 | 0.45738 | 0.47723 | 0.056 |
| H(22E) | 0.04000  | 0.48561 | 0.44926 | 0.056 |
| H(22F) | 0.01383  | 0.41065 | 0.45169 | 0.056 |
| H(31C) | 0.00066  | 0.08958 | 0.40072 | 0.033 |
| H(31D) | -0.01444 | 0.10209 | 0.43579 | 0.033 |
| H(32D) | -0.19397 | 0.15397 | 0.40960 | 0.052 |
| H(32E) | -0.10158 | 0.20651 | 0.42576 | 0.052 |
| H(32F) | -0.08629 | 0.19385 | 0.39026 | 0.052 |
| H(41C) | 0.25040  | 0.06290 | 0.40357 | 0.037 |
| H(41D) | 0.23621  | 0.06689 | 0.43911 | 0.037 |
| H(42D) | 0.46569  | 0.07395 | 0.42549 | 0.054 |
| H(42E) | 0.43407  | 0.13511 | 0.40514 | 0.054 |
| H(42F) | 0.41970  | 0.13915 | 0.44111 | 0.054 |
| H(51C) | 0.19898  | 0.08538 | 0.30915 | 0.028 |
| H(51D) | 0.17134  | 0.10419 | 0.27500 | 0.028 |
| H(52D) | -0.03244 | 0.06193 | 0.29675 | 0.041 |
| H(52E) | -0.02902 | 0.11582 | 0.32228 | 0.041 |
| H(52F) | -0.05691 | 0.13480 | 0.28782 | 0.041 |
| H(61C) | 0.22776  | 0.19431 | 0.24137 | 0.031 |
| H(61D) | 0.27320  | 0.26657 | 0.24190 | 0.031 |
| H(62D) | 0.06448  | 0.25700 | 0.21586 | 0.062 |
| H(62E) | -0.00368 | 0.22577 | 0.24515 | 0.062 |
| H(62F) | 0.04224  | 0.29879 | 0.24568 | 0.062 |
| H(71C) | 0.26388  | 0.53394 | 0.26234 | 0.031 |
| H(71D) | 0.20774  | 0.46483 | 0.25575 | 0.031 |
| H(72D) | 0.40711  | 0.48240 | 0.22684 | 0.038 |
| H(72E) | 0.49134  | 0.49601 | 0.25707 | 0.038 |
| H(72F) | 0.43452  | 0.42609 | 0.25040 | 0.038 |
| H(81C) | 0.34434  | 0.60117 | 0.30529 | 0.037 |
| H(81D) | 0.35558  | 0.59988 | 0.34098 | 0.037 |
| H(82D) | 0.16632  | 0.66342 | 0.32653 | 0.066 |
| H(82E) | 0.10192  | 0.60417 | 0.30894 | 0.066 |
| H(82F) | 0.11328  | 0.60287 | 0.34501 | 0.066 |

|        |         |         |          |       |
|--------|---------|---------|----------|-------|
| H(1SA) | 0.24350 | 0.31067 | -0.01764 | 0.134 |
| H(2SA) | 0.48112 | 0.27539 | 0.00672  | 0.083 |
